# Supplementary material for: Fast screening of polycyclic aromatic hydrocarbons using trapped ion mobility spectrometry – mass spectrometry
Source: Royal Society of Chemistry journal article supplement (doi:10.1039/c4ay01655f), 2014-01-01
Supplement: c4ay01655f1.pdf [file c4ay01655f1.pdf]

## Supporting Information

### **Fast Screening of Polycyclic Aromatic Hydrocarbons using Trapped Ion Mobility Spectrometry – Mass Spectrometry**

Anthony Castellanos<sup>†</sup>, Paolo Benigni<sup>†</sup>, Diana Hernandez<sup>†</sup>, John Daniel DeBord<sup>†</sup>, Mark Ridgeway<sup>‡</sup>, Melvin Park<sup>‡</sup>, and Francisco Fernandez-Lima<sup>†</sup>

<sup>†</sup>*Department of Chemistry and Biochemistry, Florida International University, Miami, FL 33199, USA.*

<sup>‡</sup>*Bruker Daltonics, Inc., Billerica, Massachusetts 01821, USA*

**Table S1.** Relative abundance of the analyte in the PAHs in Soil standard as reported by manufacturer. PAHs in Soil. SQC017-40GMfg Lot 014529

| Analyte                      | Concentration In Soil (ppb) | Units |
|------------------------------|-----------------------------|-------|
| Naphthalene 5005             | 906 ± 9                     | µg/Kg |
| Acenaphthene 5500            | 533 ± 5                     | µg/Kg |
| Acenaphthylene 5505          | 236 ± 2                     | µg/Kg |
| Anthracene 5555              | 827 ± 8                     | µg/Kg |
| Benzo(a)Anthracene 5575      | 176 ± 2                     | µg/Kg |
| Benzo(a)Pyrene 5580          | 260 ± 3                     | µg/Kg |
| Benzo(b)Fluoranthene 5585    | 151 ± 1                     | µg/Kg |
| Benzo(g,h,i)perylene 5590    | 461 ± 4                     | µg/Kg |
| Benzo(k)Fluoranthene 5600    | 262 ± 3                     | µg/Kg |
| Chrysene 5855                | 383 ± 4                     | µg/Kg |
| Dibenzo(a,h)Anthracene 5895  | 298 ± 3                     | µg/Kg |
| Fluoranthene 6265            | 613 ± 6                     | µg/Kg |
| Fluorene 6270                | 314 ± 3                     | µg/Kg |
| Indeno(1,2,3-cd) Pyrene 6315 | 238 ± 2                     | µg/Kg |
| Phenanthrene 6615            | 845 ± 8                     | µg/Kg |
| Pyrene 6665                  | 341 ± 3                     | µg/Kg |

**Table S2.** Experimental and theoretical ion neutral collision cross section for standard and extract PAHs obtained using TIMS-MS.

|                          | m/z     | Formula                         | Theoretical CCS [ $\text{\AA}^2$ ] |                                                |                                                   |                                              | Experimental                                 |                                |                                    |
|--------------------------|---------|---------------------------------|------------------------------------|------------------------------------------------|---------------------------------------------------|----------------------------------------------|----------------------------------------------|--------------------------------|------------------------------------|
|                          |         |                                 | TM<br>b3lyp/cc-<br>pvtz<br>(He)    | TM<br>b3lyp/6-<br>31+g(d)<br>(N <sub>2</sub> ) | TM<br>b3lyp/6-<br>31++g(d,p)<br>(N <sub>2</sub> ) | TM<br>b3lyp/cc-<br>pvdz<br>(N <sub>2</sub> ) | TM<br>b3lyp/cc-<br>pvtz<br>(N <sub>2</sub> ) | CCS [ $\text{\AA}^2$ ]<br>TIMS | CCS [ $\text{\AA}^2$ ]<br>reported |
| Naphthalene              | 128.062 | C <sub>10</sub> H <sub>8</sub>  | 63.83                              | 119.31                                         | 119.29                                            | 119.35                                       | 120.62                                       | 114 ±2                         | (115.8‡)                           |
| Acenaphthylene           | 152.062 | C <sub>12</sub> H <sub>8</sub>  | 68.80                              | 123.67                                         | 123.83                                            | 123.57                                       | 123.83                                       | 122 ±2                         |                                    |
| Acenaphthene             | 154.078 | C <sub>12</sub> H <sub>10</sub> | 68.42                              | 125.85                                         | 125.67                                            | 125.55                                       | 125.51                                       | 123 ±2                         |                                    |
| Fluorene                 | 166.078 | C <sub>13</sub> H <sub>10</sub> | 74.83                              | 132.31                                         | 132.27                                            | 132.21                                       | 132.21                                       | 125 ±3                         |                                    |
| Anthracene               | 178.078 | C <sub>14</sub> H <sub>10</sub> | 75.91                              | 134.30                                         | 134.15                                            | 134.05                                       | 134.20                                       | 128 ±3                         | (128†, 129.6‡)                     |
| Phenanthrene             | 178.078 | C <sub>14</sub> H <sub>10</sub> | 77.20                              | 131.82                                         | 131.76                                            | 131.83                                       | 131.81                                       | 128 ±3                         | (129.1‡)                           |
| Fluoranthene             | 202.078 | C <sub>16</sub> H <sub>10</sub> | 80.42                              | 140.17                                         | 140.06                                            | 139.80                                       | 139.75                                       | 135 ±3                         |                                    |
| Pyrene                   | 202.078 | C <sub>16</sub> H <sub>10</sub> | 81.31                              | 136.68                                         | 136.76                                            | 136.51                                       | 136.70                                       | 134 ±6                         | (135†, 135‡)                       |
| 1,2 Benzanthracene       | 228.093 | C <sub>18</sub> H <sub>12</sub> | 89.47                              | 149.15                                         | 149.32                                            | 149.26                                       | 148.98                                       | 143 ±9                         |                                    |
| 2,3 Benzanthracene       | 228.093 | C <sub>18</sub> H <sub>12</sub> | 92.24                              | 148.28                                         | 148.28                                            | 148.16                                       | 148.16                                       | 142 ±6                         |                                    |
| Chrysene                 | 228.093 | C <sub>18</sub> H <sub>12</sub> | 88.02                              | 150.61                                         | 150.57                                            | 150.56                                       | 150.68                                       | 142 ±8                         |                                    |
| Triphenylene             | 228.093 | C <sub>18</sub> H <sub>12</sub> | 86.69                              | 146.76                                         | 146.84                                            | 146.38                                       | 146.68                                       | 141 ±7                         | (143.3‡)                           |
| Benzo(a)pyrene           | 252.093 | C <sub>20</sub> H <sub>12</sub> | 91.97                              | 151.19                                         | 151.21                                            | 151.63                                       | 151.58                                       | 146 ±7                         |                                    |
| Benzo(e)pyrene           | 252.093 | C <sub>20</sub> H <sub>12</sub> | 89.70                              | 148.34                                         | 148.41                                            | 148.45                                       | 148.39                                       | 146 ±8                         |                                    |
| Benzo(b)fluoranthene     | 252.093 | C <sub>20</sub> H <sub>12</sub> | 92.86                              | 152.04                                         | 152.06                                            | 152.09                                       | 151.92                                       | 152 ±3                         |                                    |
| Benzo(k)fluoranthene     | 252.093 | C <sub>20</sub> H <sub>12</sub> | 97.53                              | 157.81                                         | 157.67                                            | 157.88                                       | 156.78                                       | 152 ±3                         |                                    |
| Perylene                 | 252.093 | C <sub>20</sub> H <sub>12</sub> | 89.83                              | 152.65                                         | 152.68                                            | 152.91                                       | 152.73                                       | 147 ±6                         | (147†)                             |
| Benzo(g,h,i)perylene     | 276.093 | C <sub>22</sub> H <sub>12</sub> | 97.25                              | 157.47                                         | 157.49                                            | 157.17                                       | 157.45                                       | 154 ±3                         |                                    |
| Indeno(1,2,3-cd)pyrene   | 276.093 | C <sub>22</sub> H <sub>12</sub> | 98.43                              | 160.80                                         | 161.05                                            | 160.69                                       | 160.98                                       | 154 ±3                         |                                    |
| 1,2,3,4 Dibenzanthracene | 278.109 | C <sub>22</sub> H <sub>14</sub> | 100.71                             | 162.98                                         | 162.86                                            | 162.67                                       | 162.88                                       | 158 ±5                         |                                    |
| 1,2:5,6 Dibenzanthracene | 278.109 | C <sub>22</sub> H <sub>14</sub> | 102.50                             | 163.21                                         | 162.99                                            | 162.84                                       | 162.99                                       | 160 ±7                         |                                    |
| Pentacene                | 278.109 | C <sub>22</sub> H <sub>14</sub> | 108.27                             | 169.45                                         | 169.44                                            | 169.50                                       | 169.50                                       | 158 ±6                         | (159†)                             |
| Rubrene                  | 532.219 | C <sub>42</sub> H <sub>28</sub> | 165.45                             | 240.01                                         | 239.94                                            | 240.09                                       | 239.95                                       | 232 ±6                         |                                    |

Footnote: †reference <sup>21</sup>, ‡ reference <sup>19</sup>

**Table S3.** PAH geometry and partial charges (use for MOBCAL input files) at different DFT/B3LYP levels of theory.

| Naphthalene         |           |           |      |                                 |                    |               |               |
|---------------------|-----------|-----------|------|---------------------------------|--------------------|---------------|---------------|
| Atom Orientation    |           |           |      | Electrostatic Potential Charges |                    |               |               |
| Coordinates (x,y,z) |           |           | mass | b3lyp/6-31+G(d)                 | b3lyp/6-31++G(d,p) | b3lyp/cc-pvdz | b3lyp/cc-pvtz |
| 0.000000            | 0.695498  | 2.450190  | 12   | -0.038951                       | -0.069869          | -0.058944     | -0.064265     |
| 0.000000            | 1.400938  | 1.234971  | 12   | -0.114876                       | -0.049845          | -0.021976     | -0.049169     |
| 0.000000            | 0.715353  | 0.000000  | 12   | 0.152010                        | 0.080883           | 0.042854      | 0.080191      |
| 0.000000            | -0.715353 | 0.000000  | 12   | 0.152010                        | 0.080883           | 0.042854      | 0.080191      |
| 0.000000            | -1.400938 | 1.234971  | 12   | -0.114876                       | -0.049845          | -0.021976     | -0.049169     |
| 0.000000            | -0.695498 | 2.450190  | 12   | -0.038951                       | -0.069869          | -0.058943     | -0.064265     |
| 0.000000            | 2.485531  | -1.241694 | 1    | 0.170471                        | 0.162491           | 0.150744      | 0.160024      |
| 0.000000            | 1.240924  | 3.385968  | 1    | 0.157350                        | 0.170148           | 0.160388      | 0.166899      |
| 0.000000            | 2.485531  | 1.241694  | 1    | 0.170471                        | 0.160869           | 0.150076      | 0.158070      |
| 0.000000            | 1.400938  | -1.234971 | 12   | -0.114876                       | -0.059397          | -0.026816     | -0.059076     |
| 0.000000            | -1.400938 | -1.234971 | 12   | -0.114876                       | -0.059397          | -0.026816     | -0.059076     |
| 0.000000            | -2.485531 | 1.241694  | 1    | 0.170471                        | 0.160869           | 0.150076      | 0.158070      |
| 0.000000            | -1.240924 | 3.385968  | 1    | 0.157350                        | 0.170148           | 0.160388      | 0.166899      |
| 0.000000            | -0.695498 | -2.450190 | 12   | -0.038951                       | -0.064252          | -0.056377     | -0.057774     |
| 0.000000            | 0.695498  | -2.450190 | 12   | -0.038951                       | -0.064252          | -0.056376     | -0.057774     |
| 0.000000            | -2.485531 | -1.241694 | 1    | 0.170471                        | 0.162491           | 0.150744      | 0.160024      |
| 0.000000            | -1.240924 | -3.385968 | 1    | 0.157350                        | 0.168972           | 0.160051      | 0.165099      |
| 0.000000            | 1.240924  | -3.385968 | 1    | 0.157350                        | 0.168972           | 0.160051      | 0.165099      |

| Acenaphthylene      |           |           |      |                                 |                    |               |               |
|---------------------|-----------|-----------|------|---------------------------------|--------------------|---------------|---------------|
| Atom Orientation    |           |           |      | Electrostatic Potential Charges |                    |               |               |
| Coordinates (x,y,z) |           |           | Mass | b3lyp/6-31+G(d)                 | b3lyp/6-31++G(d,p) | b3lyp/cc-pvdz | b3lyp/cc-pvtz |
| 0.000000            | 0.715947  | -2.301098 | 12   | -0.046704                       | -0.059014          | -0.033746     | -0.050406     |
| 0.000000            | 1.328768  | -3.192764 | 1    | 0.184956                        | 0.184844           | 0.172211      | 0.18118       |
| 0.000000            | -1.328768 | -3.192764 | 1    | 0.184956                        | 0.184844           | 0.172211      | 0.18118       |
| 0.000000            | -0.715947 | -2.301098 | 12   | -0.046704                       | -0.059014          | -0.033746     | -0.050406     |
| 0.000000            | 1.179086  | -0.958357 | 12   | 0.034121                        | 0.034717           | 0.017241      | 0.026398      |
| 0.000000            | 0.000000  | -0.142030 | 12   | 0.215965                        | 0.196254           | 0.159179      | 0.189215      |
| 0.000000            | 2.419985  | -0.322917 | 12   | -0.147334                       | -0.116479          | -0.080705     | -0.109691     |
| 0.000000            | 0.000000  | 1.253200  | 12   | 0.103159                        | 0.089488           | 0.056932      | 0.091339      |
| 0.000000            | -1.179086 | -0.958357 | 12   | 0.034121                        | 0.034717           | 0.017241      | 0.026398      |
| 0.000000            | 2.445342  | 1.086295  | 12   | -0.071846                       | -0.08958           | -0.093565     | -0.081264     |
| 0.000000            | 3.347506  | -0.882947 | 1    | 0.183477                        | 0.18138            | 0.168408      | 0.17717       |
| 0.000000            | 1.284170  | 1.864151  | 12   | -0.140684                       | -0.119056          | -0.077527     | -0.117519     |
| 0.000000            | -1.284170 | 1.864151  | 12   | -0.140684                       | -0.119056          | -0.077527     | -0.117519     |
| 0.000000            | -2.419985 | -0.322917 | 12   | -0.147334                       | -0.116479          | -0.080705     | -0.109691     |
| 0.000000            | 3.404903  | 1.588594  | 1    | 0.165334                        | 0.165423           | 0.158728      | 0.161735      |
| 0.000000            | 1.369823  | 2.945163  | 1    | 0.179118                        | 0.174895           | 0.160898      | 0.172119      |
| 0.000000            | -2.445342 | 1.086295  | 12   | -0.071846                       | -0.08958           | -0.093565     | -0.081264     |
| 0.000000            | -1.369823 | 2.945163  | 1    | 0.179118                        | 0.174895           | 0.160898      | 0.172119      |
| 0.000000            | -3.347506 | -0.882947 | 1    | 0.183477                        | 0.18138            | 0.168408      | 0.17717       |
| 0.000000            | -3.404903 | 1.588594  | 1    | 0.165334                        | 0.165423           | 0.158728      | 0.161735      |

| Acenaphthene        |           |           |                                 |                 |                    |               |               |
|---------------------|-----------|-----------|---------------------------------|-----------------|--------------------|---------------|---------------|
| Atom Orientation    |           |           | Electrostatic Potential Charges |                 |                    |               |               |
| Coordinates (x,y,z) |           |           | Mass                            | b3lyp/6-31+G(d) | b3lyp/6-31++G(d,p) | b3lyp/cc-pvdz | b3lyp/cc-pvtz |
| 0.779751            | -2.329428 | 0.000022  | 12                              | -0.147553       | -0.143591          | -0.120477     | -0.133656     |
| 1.192364            | -2.845466 | -0.873791 | 1                               | 0.113737        | 0.114034           | 0.104577      | 0.111216      |
| -1.192308           | -2.845408 | -0.873898 | 1                               | 0.104880        | 0.105605           | 0.098881      | 0.104615      |
| -0.779753           | -2.329428 | -0.000022 | 12                              | -0.108423       | -0.106340          | -0.094121     | -0.104156     |
| 1.162886            | -0.876577 | 0.000000  | 12                              | 0.219649        | 0.205255           | 0.213194      | 0.185924      |
| 0.000000            | -0.090311 | 0.000000  | 12                              | -0.044705       | -0.028613          | -0.066642     | 0.001218      |
| 2.412113            | -0.228187 | -0.000009 | 12                              | -0.213082       | -0.206236          | -0.191289     | -0.194840     |
| 0.000000            | 1.320505  | 0.000000  | 12                              | 0.112323        | 0.105194           | 0.076612      | 0.085017      |
| -1.162886           | -0.876577 | -0.000001 | 12                              | 0.209996        | 0.196560           | 0.203380      | 0.179922      |
| 2.442165            | 1.167849  | -0.000007 | 12                              | -0.033683       | -0.034128          | -0.025452     | -0.029735     |
| 3.337654            | -0.791538 | -0.000010 | 1                               | 0.185466        | 0.183958           | 0.174180      | 0.179414      |
| 1.267047            | 1.947744  | 0.000016  | 12                              | -0.119090       | -0.116026          | -0.083148     | -0.108621     |
| -1.267046           | 1.947744  | -0.000016 | 12                              | -0.121303       | -0.117494          | -0.086923     | -0.109020     |
| -2.412113           | -0.228185 | 0.000009  | 12                              | -0.208594       | -0.202675          | -0.186440     | -0.194242     |
| 3.400094            | 1.674138  | -0.000015 | 1                               | 0.166192        | 0.164764           | 0.154958      | 0.160592      |
| 1.343234            | 3.029271  | 0.000004  | 1                               | 0.174000        | 0.173026           | 0.160239      | 0.169936      |
| -2.442165           | 1.167851  | 0.000007  | 12                              | -0.031406       | -0.032257          | -0.021567     | -0.027540     |
| -1.343231           | 3.029271  | -0.000004 | 1                               | 0.175354        | 0.174012           | 0.161496      | 0.170159      |
| -3.337654           | -0.791536 | 0.000010  | 1                               | 0.182976        | 0.181826           | 0.172021      | 0.178387      |
| -3.400094           | 1.674141  | 0.000015  | 1                               | 0.164649        | 0.163487           | 0.153065      | 0.159578      |
| -1.192366           | -2.845466 | 0.873791  | 1                               | 0.104877        | 0.105603           | 0.098879      | 0.104613      |
| 1.192306            | -2.845409 | 0.873898  | 1                               | 0.113739        | 0.114036           | 0.104579      | 0.111218      |

| Fluorene            |           |          |      |                                 |                    |               |               |
|---------------------|-----------|----------|------|---------------------------------|--------------------|---------------|---------------|
| Atom Orientation    |           |          |      | Electrostatic Potential Charges |                    |               |               |
| Coordinates (x,y,z) |           |          | Mass | b3lyp/6-31+G(d)                 | b3lyp/6-31++G(d,p) | b3lyp/cc-pvdz | b3lyp/cc-pvtz |
| 0.000000            | -1.239142 | 2.969901 | 12   | -0.145618                       | -0.142141          | -0.139703     | -0.134769     |
| -0.000004           | -1.523608 | 1.625460 | 12   | -0.109690                       | -0.109274          | -0.083951     | -0.110155     |
| -0.000004           | -0.441598 | 0.710639 | 12   | 0.047320                        | 0.047715           | 0.034609      | 0.047555      |
| 0.000000            | 0.916078  | 1.174656 | 12   | 0.262693                        | 0.261689           | 0.235166      | 0.276992      |
| 0.000005            | 1.183580  | 2.524295 | 12   | -0.277883                       | -0.274216          | -0.253899     | -0.270024     |
| 0.000004            | 0.102601  | 3.418225 | 12   | 0.078687                        | 0.078173           | 0.086424      | 0.075449      |
| 0.000000            | -2.037885 | 3.697108 | 1    | 0.170425                        | 0.168498           | 0.162526      | 0.164859      |
| -0.000008           | -2.545334 | 1.274301 | 1    | 0.163673                        | 0.162736           | 0.153146      | 0.160210      |
| 0.000008            | 2.197171  | 2.899473 | 1    | 0.191266                        | 0.189946           | 0.180098      | 0.187079      |
| 0.000008            | 0.297427  | 4.481970 | 1    | 0.141644                        | 0.140468           | 0.133947      | 0.138868      |
| 0.000000            | 0.916078  | 1.174656 | 12   | 0.262693                        | 0.261689           | 0.235166      | 0.276992      |
| -0.000004           | -0.441598 | 0.710639 | 12   | 0.047320                        | 0.047715           | 0.034609      | 0.047556      |
| 0.000005            | 1.183580  | 2.524295 | 12   | -0.277883                       | -0.274216          | -0.253899     | -0.270024     |
| -0.000004           | -1.523608 | 1.625460 | 12   | -0.109690                       | -0.109274          | -0.083951     | -0.110155     |
| 0.000004            | 0.102601  | 3.418225 | 12   | 0.078687                        | 0.078173           | 0.086424      | 0.075448      |
| 0.000008            | 2.197171  | 2.899473 | 1    | 0.191266                        | 0.189946           | 0.180098      | 0.187079      |
| 0.000000            | -1.239142 | 2.969901 | 12   | -0.145618                       | -0.142141          | -0.139703     | -0.134769     |
| -0.000008           | -2.545334 | 1.274301 | 1    | 0.163673                        | 0.162736           | 0.153146      | 0.160210      |
| 0.000008            | 0.297427  | 4.481970 | 1    | 0.141644                        | 0.140468           | 0.133947      | 0.138868      |
| 0.000000            | -2.037885 | 3.697108 | 1    | 0.170425                        | 0.168498           | 0.162526      | 0.164859      |
| -0.000002           | 1.862271  | 0.000000 | 12   | -0.396514                       | -0.404155          | -0.343909     | -0.441661     |
| -0.876752           | 2.514333  | 0.000000 | 1    | 0.175739                        | 0.178482           | 0.163591      | 0.184766      |
| 0.876739            | 2.514344  | 0.000000 | 1    | 0.175740                        | 0.178483           | 0.163591      | 0.184766      |

| Anthracene          |          |         |      |                                 |                    |               |               |
|---------------------|----------|---------|------|---------------------------------|--------------------|---------------|---------------|
| Atom Orientation    |          |         |      | Electrostatic Potential Charges |                    |               |               |
| Coordinates (x,y,z) |          |         | Mass | b3lyp/6-31+G(d)                 | b3lyp/6-31++G(d,p) | b3lyp/cc-pvdz | b3lyp/cc-pvtz |
| 3.66536             | 0.70233  | 0.00000 | 12   | -0.06693                        | -0.065708          | -0.055428     | -0.059597     |
| 2.46685             | 1.40631  | 0.00000 | 12   | -0.14632                        | -0.144944          | -0.108469     | -0.145534     |
| 1.23136             | 0.71957  | 0.00000 | 12   | 0.12693                         | 0.128618           | 0.080493      | 0.133524      |
| 1.23136             | -0.71957 | 0.00000 | 12   | 0.12693                         | 0.128618           | 0.080493      | 0.133524      |
| 2.46685             | -1.40631 | 0.00000 | 12   | -0.14632                        | -0.144944          | -0.108469     | -0.145533     |
| 3.66536             | -0.70233 | 0.00000 | 12   | -0.06693                        | -0.065708          | -0.055428     | -0.059597     |
| 0.00000             | 1.40441  | 0.00000 | 12   | -0.15936                        | -0.163824          | -0.094952     | -0.172933     |
| 0.00000             | -1.40441 | 0.00000 | 12   | -0.15936                        | -0.163824          | -0.094952     | -0.172933     |
| -1.23136            | -0.71957 | 0.00000 | 12   | 0.10928                         | 0.112075           | 0.069045      | 0.120515      |
| -1.23136            | 0.71957  | 0.00000 | 12   | 0.10928                         | 0.112075           | 0.069045      | 0.120515      |
| -2.46685            | 1.40631  | 0.00000 | 12   | -0.12761                        | -0.126855          | -0.096911     | -0.129976     |
| -2.47169            | 2.49046  | 0.00000 | 1    | 0.16602                         | 0.164969           | 0.151944      | 0.163235      |
| -3.66536            | 0.70233  | 0.00000 | 12   | -0.06959                        | -0.068821          | -0.056655     | -0.063554     |
| -3.66536            | -0.70233 | 0.00000 | 12   | -0.06959                        | -0.068821          | -0.056655     | -0.063554     |
| -2.46685            | -1.40631 | 0.00000 | 12   | -0.12761                        | -0.126855          | -0.096911     | -0.129976     |
| 0.00000             | 2.48991  | 0.00000 | 1    | 0.17012                         | 0.170876           | 0.152536      | 0.169642      |
| 4.60573             | 1.24001  | 0.00000 | 1    | 0.16429                         | 0.162764           | 0.152480      | 0.158964      |
| 2.47169             | 2.49046  | 0.00000 | 1    | 0.16994                         | 0.168812           | 0.154317      | 0.166631      |
| 2.47169             | -2.49046 | 0.00000 | 1    | 0.16994                         | 0.168812           | 0.154317      | 0.166631      |
| 4.60573             | -1.24001 | 0.00000 | 1    | 0.16429                         | 0.162764           | 0.152480      | 0.158964      |
| 0.00000             | -2.48991 | 0.00000 | 1    | 0.17012                         | 0.170876           | 0.152536      | 0.169642      |
| -4.60573            | 1.24001  | 0.00000 | 1    | 0.16322                         | 0.162037           | 0.151600      | 0.159082      |
| -4.60573            | -1.24001 | 0.00000 | 1    | 0.16322                         | 0.162037           | 0.151600      | 0.159082      |
| -2.47169            | -2.49046 | 0.00000 | 1    | 0.16602                         | 0.164969           | 0.151944      | 0.163235      |



| Phenanthrene        |           |           |      |                                 |                    |               |               |
|---------------------|-----------|-----------|------|---------------------------------|--------------------|---------------|---------------|
| Atom Orientation    |           |           |      | Electrostatic Potential Charges |                    |               |               |
| Coordinates (x,y,z) |           |           | Mass | b3lyp/6-31+G(d)                 | b3lyp/6-31++G(d,p) | b3lyp/cc-pvdz | b3lyp/cc-pvtz |
| 0.000000            | 3.578396  | -0.281698 | 12   | -0.081823                       | -0.079176          | -0.085092     | -0.080849     |
| 0.000000            | 2.851750  | 0.887106  | 12   | -0.164108                       | -0.163036          | -0.121101     | -0.150307     |
| 0.000000            | 1.426625  | 0.858513  | 12   | 0.199966                        | 0.200075           | 0.137459      | 0.178519      |
| 0.000000            | 0.731566  | -0.395850 | 12   | 0.044502                        | 0.043232           | 0.041819      | 0.050320      |
| 0.000000            | 1.498665  | -1.558220 | 12   | -0.162340                       | -0.160126          | -0.142742     | -0.162360     |
| 0.000000            | 2.896860  | -1.504380 | 12   | 0.000510                        | 0.001422           | 0.015277      | 0.008053      |
| 0.000000            | 0.698749  | 2.056675  | 12   | -0.137346                       | -0.136406          | -0.091850     | -0.122776     |
| 0.000000            | -0.731566 | -0.395850 | 12   | 0.044502                        | 0.043232           | 0.041819      | 0.050320      |
| 0.000000            | -1.426625 | 0.858513  | 12   | 0.199966                        | 0.200075           | 0.137459      | 0.178519      |
| 0.000000            | -0.698749 | 2.056675  | 12   | -0.137346                       | -0.136406          | -0.091850     | -0.122776     |
| 0.000000            | -2.851750 | 0.887106  | 12   | -0.164108                       | -0.163036          | -0.121101     | -0.150307     |
| 0.000000            | -3.351002 | 1.846492  | 1    | 0.163157                        | 0.161954           | 0.151928      | 0.158242      |
| 0.000000            | -3.578396 | -0.281698 | 12   | -0.081823                       | -0.079176          | -0.085092     | -0.080849     |
| 0.000000            | -2.896860 | -1.504380 | 12   | 0.000510                        | 0.001422           | 0.015277      | 0.008053      |
| 0.000000            | -1.498665 | -1.558220 | 12   | -0.162340                       | -0.160126          | -0.142742     | -0.162360     |
| 0.000000            | 1.229996  | 2.999027  | 1    | 0.180338                        | 0.179568           | 0.161651      | 0.173809      |
| 0.000000            | 4.658048  | -0.259685 | 1    | 0.154044                        | 0.152067           | 0.147753      | 0.150767      |
| 0.000000            | 3.351002  | 1.846492  | 1    | 0.163157                        | 0.161954           | 0.151928      | 0.158242      |
| 0.000000            | 1.027502  | -2.529139 | 1    | 0.160366                        | 0.159145           | 0.150792      | 0.157586      |
| 0.000000            | 3.456344  | -2.429564 | 1    | 0.142734                        | 0.141281           | 0.134106      | 0.138996      |
| 0.000000            | -1.229996 | 2.999027  | 1    | 0.180338                        | 0.179568           | 0.161651      | 0.173809      |
| 0.000000            | -4.658048 | -0.259685 | 1    | 0.154044                        | 0.152067           | 0.147753      | 0.150767      |
| 0.000000            | -3.456344 | -2.429564 | 1    | 0.142734                        | 0.141281           | 0.134106      | 0.138996      |
| 0.000000            | -1.027502 | -2.529139 | 1    | 0.160366                        | 0.159145           | 0.150792      | 0.157586      |

| Fluoranthene        |           |          |      |                                 |                    |               |               |
|---------------------|-----------|----------|------|---------------------------------|--------------------|---------------|---------------|
| Atom Orientation    |           |          |      | Electrostatic Potential Charges |                    |               |               |
| Coordinates (x,y,z) |           |          | Mass | b3lyp/6-31+G(d)                 | b3lyp/6-31++G(d,p) | b3lyp/cc-pvdz | b3lyp/cc-pvtz |
| 2.151554            | 2.441100  | 0.000000 | 12   | -0.053618                       | -0.048559          | -0.058826     | -0.040184     |
| 2.930532            | 1.270900  | 0.000000 | 12   | -0.123892                       | -0.126538          | -0.078928     | -0.127589     |
| 0.749564            | 2.410945  | 0.000000 | 12   | -0.138793                       | -0.138916          | -0.108978     | -0.137394     |
| 2.302167            | 0.000028  | 0.000000 | 12   | 0.089722                        | 0.094048           | 0.052384      | 0.104895      |
| 0.901285            | -0.000030 | 0.000000 | 12   | 0.099129                        | 0.096918           | 0.057401      | 0.072481      |
| 0.104057            | 1.165478  | 0.000000 | 12   | 0.097320                        | 0.097282           | 0.098202      | 0.098124      |
| 0.104173            | -1.165551 | 0.000000 | 12   | 0.097131                        | 0.097091           | 0.098002      | 0.097937      |
| 0.749767            | -2.410931 | 0.000000 | 12   | -0.138721                       | -0.138842          | -0.108900     | -0.137319     |
| 2.151800            | -2.440997 | 0.000000 | 12   | -0.053631                       | -0.048572          | -0.058839     | -0.040201     |
| 2.930676            | -1.270786 | 0.000000 | 12   | -0.124098                       | -0.126743          | -0.079129     | -0.127798     |
| 0.193206            | 3.340723  | 0.000000 | 1    | 0.170142                        | 0.169250           | 0.158421      | 0.166594      |
| 0.193496            | -3.340762 | 0.000000 | 1    | 0.170124                        | 0.169231           | 0.158401      | 0.166575      |
| 2.654578            | -3.400617 | 0.000000 | 1    | 0.153137                        | 0.150853           | 0.146586      | 0.147975      |
| 4.012190            | -1.347048 | 0.000000 | 1    | 0.170467                        | 0.170207           | 0.155544      | 0.167723      |
| -1.292868           | -0.712990 | 0.000000 | 12   | -0.038357                       | -0.038433          | -0.044003     | -0.028482     |
| -1.292888           | 0.712884  | 0.000000 | 12   | -0.038439                       | -0.038519          | -0.044103     | -0.028553     |
| -2.488679           | -1.414641 | 0.000000 | 12   | -0.043353                       | -0.042552          | -0.024609     | -0.047620     |
| -2.488750           | 1.414561  | 0.000000 | 12   | -0.043206                       | -0.042405          | -0.024459     | -0.047480     |
| -3.708996           | -0.691341 | 0.000000 | 12   | -0.103428                       | -0.101265          | -0.090799     | -0.095029     |
| -2.505270           | -2.498357 | 0.000000 | 1    | 0.154058                        | 0.153207           | 0.141789      | 0.150978      |
| -3.709028           | 0.691284  | 0.000000 | 12   | -0.103741                       | -0.101577          | -0.091105     | -0.095337     |
| -2.505319           | 2.498277  | 0.000000 | 1    | 0.154043                        | 0.153192           | 0.141773      | 0.150964      |
| -4.646475           | -1.233372 | 0.000000 | 1    | 0.162188                        | 0.160278           | 0.151011      | 0.156510      |
| -4.646523           | 1.233284  | 0.000000 | 1    | 0.162226                        | 0.160316           | 0.151047      | 0.156546      |
| 4.012039            | 1.347275  | 0.000000 | 1    | 0.170448                        | 0.170189           | 0.155527      | 0.167705      |
| 2.654292            | 3.400741  | 0.000000 | 1    | 0.153141                        | 0.150857           | 0.146592      | 0.147979      |

| Pyrene              |           |           |      |                                 |                    |               |               |
|---------------------|-----------|-----------|------|---------------------------------|--------------------|---------------|---------------|
| Atom Orientation    |           |           |      | Electrostatic Potential Charges |                    |               |               |
| Coordinates (x,y,z) |           |           | Mass | b3lyp/6-31+G(d)                 | b3lyp/6-31++G(d,p) | b3lyp/cc-pvdz | b3lyp/cc-pvtz |
| 0.000000            | -1.205595 | 2.841608  | 12   | -0.121582                       | -0.156997          | -0.102269     | -0.150356     |
| 0.000000            | 1.232551  | 1.419803  | 12   | 0.148992                        | 0.191130           | 0.135590      | 0.182494      |
| 0.000000            | 1.205595  | 2.841608  | 12   | -0.121582                       | -0.156997          | -0.102269     | -0.150356     |
| 0.000000            | 0.000000  | 3.537325  | 12   | -0.082477                       | -0.041125          | -0.065894     | -0.038941     |
| 0.000000            | -2.144686 | 3.384033  | 1    | 0.163161                        | 0.165857           | 0.152058      | 0.162770      |
| 0.000000            | 2.144686  | 3.384033  | 1    | 0.163161                        | 0.165857           | 0.152058      | 0.162770      |
| 0.000000            | 0.000000  | 4.620015  | 1    | 0.158388                        | 0.148408           | 0.146149      | 0.146600      |
| 0.000000            | 0.000000  | 0.707815  | 12   | 0.001517                        | -0.023463          | -0.012305     | -0.023569     |
| 0.000000            | 0.000000  | -0.707815 | 12   | 0.001517                        | -0.023463          | -0.012305     | -0.023569     |
| 0.000000            | -1.232551 | 1.419803  | 12   | 0.148992                        | 0.191130           | 0.135590      | 0.182494      |
| 0.000000            | -1.232551 | -1.419803 | 12   | 0.148992                        | 0.191130           | 0.135590      | 0.182494      |
| 0.000000            | -2.448634 | 0.692064  | 12   | -0.153958                       | -0.171310          | -0.132948     | -0.161210     |
| 0.000000            | -2.448634 | -0.692064 | 12   | -0.153958                       | -0.171310          | -0.132948     | -0.161210     |
| 0.000000            | -3.388518 | 1.232375  | 1    | 0.174674                        | 0.179410           | 0.163595      | 0.174258      |
| 0.000000            | -3.388518 | -1.232375 | 1    | 0.174674                        | 0.179410           | 0.163595      | 0.174258      |
| 0.000000            | 2.448634  | 0.692064  | 12   | -0.153958                       | -0.171310          | -0.132948     | -0.161210     |
| 0.000000            | 2.448634  | -0.692064 | 12   | -0.153958                       | -0.171310          | -0.132948     | -0.161210     |
| 0.000000            | 3.388518  | 1.232375  | 1    | 0.174674                        | 0.179410           | 0.163595      | 0.174258      |
| 0.000000            | 3.388518  | -1.232375 | 1    | 0.174674                        | 0.179410           | 0.163595      | 0.174258      |
| 0.000000            | 1.232551  | -1.419803 | 12   | 0.148992                        | 0.191130           | 0.135590      | 0.182494      |
| 0.000000            | 1.205595  | -2.841608 | 12   | -0.121582                       | -0.156997          | -0.102269     | -0.150356     |
| 0.000000            | 0.000000  | -3.537325 | 12   | -0.082477                       | -0.041125          | -0.065894     | -0.038941     |
| 0.000000            | 2.144686  | -3.384033 | 1    | 0.163161                        | 0.165857           | 0.152058      | 0.162770      |
| 0.000000            | -1.205595 | -2.841608 | 12   | -0.121582                       | -0.156997          | -0.102269     | -0.150356     |
| 0.000000            | 0.000000  | -4.620015 | 1    | 0.158388                        | 0.148408           | 0.146149      | 0.146600      |
| 0.000000            | -2.144686 | -3.384033 | 1    | 0.163161                        | 0.165857           | 0.152058      | 0.162770      |

| 1,2-Benzanthracene  |           |          |      |                                 |                    |               |               |
|---------------------|-----------|----------|------|---------------------------------|--------------------|---------------|---------------|
| Atom Orientation    |           |          |      | Electrostatic Potential Charges |                    |               |               |
| Coordinates (x,y,z) |           |          | Mass | b3lyp/6-31+G(d)                 | b3lyp/6-31++G(d,p) | b3lyp/cc-pvdz | b3lyp/cc-pvtz |
| 4.765370            | -0.015140 | 0.000000 | 12   | -0.094566                       | -0.092515          | -0.080066     | -0.084206     |
| 3.805658            | 0.988527  | 0.000000 | 12   | -0.148681                       | -0.147278          | -0.108969     | -0.147528     |
| 2.428530            | 0.662611  | 0.000000 | 12   | 0.137456                        | 0.139372           | 0.085272      | 0.143313      |
| 2.031904            | -0.714595 | 0.000000 | 12   | 0.095030                        | 0.096516           | 0.058303      | 0.106571      |
| 3.027834            | -1.711451 | 0.000000 | 12   | -0.153390                       | -0.151525          | -0.116402     | -0.152477     |
| 4.376277            | -1.363814 | 0.000000 | 12   | -0.049549                       | -0.050190          | -0.041939     | -0.049741     |
| 1.422666            | 1.645534  | 0.000000 | 12   | -0.160015                       | -0.164950          | -0.099602     | -0.175807     |
| 0.651224            | -1.037368 | 0.000000 | 12   | -0.117113                       | -0.118337          | -0.069931     | -0.128848     |
| -0.351511           | -0.065447 | 0.000000 | 12   | -0.016911                       | -0.019222          | -0.024024     | -0.020308     |
| 0.052493            | 1.314450  | 0.000000 | 12   | 0.127263                        | 0.132380           | 0.090553      | 0.145033      |
| -0.927144           | 2.339731  | 0.000000 | 12   | -0.160342                       | -0.160261          | -0.130942     | -0.163687     |
| -0.607283           | 3.375382  | 0.000000 | 1    | 0.173022                        | 0.172135           | 0.156871      | 0.170177      |
| -2.270385           | 2.029601  | 0.000000 | 12   | -0.122644                       | -0.122160          | -0.084451     | -0.113737     |
| -2.722935           | 0.686609  | 0.000000 | 12   | 0.135530                        | 0.134775           | 0.098367      | 0.125312      |
| -1.768228           | -0.390487 | 0.000000 | 12   | 0.142297                        | 0.142674           | 0.114235      | 0.151720      |
| 1.705780            | 2.693355  | 0.000000 | 1    | 0.161491                        | 0.162214           | 0.145741      | 0.161395      |
| 5.817378            | 0.242471  | 0.000000 | 1    | 0.164625                        | 0.162995           | 0.151836      | 0.158900      |
| 4.104224            | 2.030852  | 0.000000 | 1    | 0.168719                        | 0.167455           | 0.152150      | 0.164874      |
| 2.737249            | -2.756024 | 0.000000 | 1    | 0.164564                        | 0.163365           | 0.148700      | 0.161608      |
| 5.130906            | -2.141089 | 0.000000 | 1    | 0.156080                        | 0.155106           | 0.145357      | 0.153093      |
| 0.389134            | -2.088096 | 0.000000 | 1    | 0.150384                        | 0.150368           | 0.137807      | 0.149603      |
| -3.006626           | 2.825741  | 0.000000 | 1    | 0.168667                        | 0.167945           | 0.151936      | 0.164153      |
| -4.113174           | 0.400170  | 0.000000 | 12   | -0.195237                       | -0.193043          | -0.158887     | -0.187650     |
| -4.559348           | -0.900204 | 0.000000 | 12   | -0.094786                       | -0.092302          | -0.083122     | -0.083420     |
| -4.815340           | 1.225847  | 0.000000 | 1    | 0.167716                        | 0.166101           | 0.153010      | 0.162002      |
| -2.263910           | -1.709583 | 0.000000 | 12   | -0.249212                       | -0.245737          | -0.211804     | -0.247268     |
| -3.624358           | -1.959153 | 0.000000 | 12   | -0.028747                       | -0.029669          | -0.018987     | -0.028428     |
| -5.620318           | -1.117516 | 0.000000 | 1    | 0.160736                        | 0.158894           | 0.148595      | 0.154365      |
| -1.585533           | -2.551951 | 0.000000 | 1    | 0.169449                        | 0.167646           | 0.153626      | 0.166093      |
| -3.978097           | -2.983414 | 0.000000 | 1    | 0.148165                        | 0.147247           | 0.136766      | 0.144889      |

| 2,3-Benzanthracene  |           |           |      |                                 |                    |               |               |
|---------------------|-----------|-----------|------|---------------------------------|--------------------|---------------|---------------|
| Atom Orientation    |           |           |      | Electrostatic Potential Charges |                    |               |               |
| Coordinates (x,y,z) |           |           | Mass | b3lyp/6-31+G(d)                 | b3lyp/6-31++G(d,p) | b3lyp/cc-pvdz | b3lyp/cc-pvtz |
| 0.000000            | 4.889490  | 0.707115  | 12   | -0.068502                       | -0.067013          | -0.056210     | -0.061539     |
| 0.000000            | 3.699122  | 1.409913  | 12   | -0.175644                       | -0.174559          | -0.146619     | -0.175427     |
| 0.000000            | 2.458000  | 0.722471  | 12   | 0.174601                        | 0.175036           | 0.127140      | 0.174325      |
| 0.000000            | 2.458000  | -0.722471 | 12   | 0.174601                        | 0.175036           | 0.127140      | 0.174325      |
| 0.000000            | 3.699122  | -1.409913 | 12   | -0.175644                       | -0.174559          | -0.146619     | -0.175427     |
| 0.000000            | 4.889490  | -0.707115 | 12   | -0.068502                       | -0.067013          | -0.056210     | -0.061539     |
| 0.000000            | 1.229196  | 1.408423  | 12   | -0.261375                       | -0.263720          | -0.182204     | -0.259679     |
| 0.000000            | 1.229196  | -1.408423 | 12   | -0.261375                       | -0.263720          | -0.182204     | -0.259679     |
| 0.000000            | 0.000000  | -0.725437 | 12   | 0.161539                        | 0.164021           | 0.104041      | 0.163783      |
| 0.000000            | 0.000000  | 0.725437  | 12   | 0.161539                        | 0.164021           | 0.104041      | 0.163783      |
| 0.000000            | -1.229196 | 1.408423  | 12   | -0.261375                       | -0.263720          | -0.182204     | -0.259679     |
| 0.000000            | -1.230955 | 2.495714  | 1    | 0.187552                        | 0.188073           | 0.164515      | 0.184032      |
| 0.000000            | -2.458000 | 0.722471  | 12   | 0.174601                        | 0.175036           | 0.127140      | 0.174325      |
| 0.000000            | -2.458000 | -0.722471 | 12   | 0.174601                        | 0.175036           | 0.127140      | 0.174325      |
| 0.000000            | -1.229196 | -1.408423 | 12   | -0.261375                       | -0.263720          | -0.182204     | -0.259679     |
| 0.000000            | 1.230955  | 2.495714  | 1    | 0.187552                        | 0.188073           | 0.164515      | 0.184032      |
| 0.000000            | 5.834163  | 1.241768  | 1    | 0.152811                        | 0.151384           | 0.142774      | 0.148783      |
| 0.000000            | 3.701751  | 2.496164  | 1    | 0.159788                        | 0.158788           | 0.148583      | 0.157613      |
| 0.000000            | 3.701751  | -2.496164 | 1    | 0.159788                        | 0.158788           | 0.148583      | 0.157613      |
| 0.000000            | 5.834163  | -1.241768 | 1    | 0.152811                        | 0.151384           | 0.142774      | 0.148783      |
| 0.000000            | 1.230955  | -2.495714 | 1    | 0.187552                        | 0.188073           | 0.164515      | 0.184032      |
| 0.000000            | -1.230955 | -2.495714 | 1    | 0.187552                        | 0.188073           | 0.164515      | 0.184032      |
| 0.000000            | -3.699122 | 1.409913  | 12   | -0.175644                       | -0.174559          | -0.146619     | -0.175427     |
| 0.000000            | -4.889490 | 0.707115  | 12   | -0.068502                       | -0.067013          | -0.056210     | -0.061539     |
| 0.000000            | -3.701751 | 2.496164  | 1    | 0.159788                        | 0.158788           | 0.148583      | 0.157613      |
| 0.000000            | -3.699122 | -1.409913 | 12   | -0.175644                       | -0.174559          | -0.146619     | -0.175427     |
| 0.000000            | -4.889490 | -0.707115 | 12   | -0.068502                       | -0.067013          | -0.056210     | -0.061539     |
| 0.000000            | -5.834163 | 1.241768  | 1    | 0.152811                        | 0.151384           | 0.142774      | 0.148783      |
| 0.000000            | -3.701751 | -2.496164 | 1    | 0.159788                        | 0.158788           | 0.148583      | 0.157613      |
| 0.000000            | -5.834163 | -1.241768 | 1    | 0.152811                        | 0.151384           | 0.142774      | 0.148783      |

| Chrysene            |           |          |      |                                 |                    |               |               |
|---------------------|-----------|----------|------|---------------------------------|--------------------|---------------|---------------|
| Atom Orientation    |           |          |      | Electrostatic Potential Charges |                    |               |               |
| Coordinates (x,y,z) |           |          | Mass | b3lyp/6-31+G(d)                 | b3lyp/6-31++G(d,p) | b3lyp/cc-pvdz | b3lyp/cc-pvtz |
| -0.661378           | 3.923861  | 0.000000 | 12   | -0.120373                       | -0.120777          | -0.091304     | -0.122678     |
| 1.794618            | 2.594647  | 0.000000 | 12   | -0.145431                       | -0.144431          | -0.114793     | -0.151844     |
| 1.741054            | 3.989607  | 0.000000 | 12   | -0.068822                       | -0.066515          | -0.055860     | -0.057257     |
| 0.513905            | 4.660058  | 0.000000 | 12   | -0.108115                       | -0.105680          | -0.093536     | -0.097901     |
| -1.622945           | 4.424745  | 0.000000 | 1    | 0.156495                        | 0.155677           | 0.143754      | 0.153597      |
| 2.768476            | 2.124518  | 0.000000 | 1    | 0.153339                        | 0.152088           | 0.141042      | 0.151148      |
| 2.665594            | 4.554457  | 0.000000 | 1    | 0.158817                        | 0.156957           | 0.146164      | 0.152373      |
| 0.482340            | 5.742433  | 0.000000 | 1    | 0.165296                        | 0.163418           | 0.152503      | 0.158873      |
| -0.626314           | 2.510150  | 0.000000 | 12   | 0.081244                        | 0.083190           | 0.046787      | 0.083509      |
| -1.826515           | 1.758410  | 0.000000 | 12   | -0.062349                       | -0.062811          | -0.029900     | -0.061200     |
| 0.622297            | 1.821058  | 0.000000 | 12   | 0.061559                        | 0.060614           | 0.036381      | 0.067759      |
| -1.823185           | 0.372771  | 0.000000 | 12   | -0.191163                       | -0.189649          | -0.164731     | -0.187374     |
| -2.773942           | 2.286613  | 0.000000 | 1    | 0.157533                        | 0.157058           | 0.143048      | 0.154416      |
| 0.626314            | 0.361792  | 0.000000 | 12   | 0.077103                        | 0.076888           | 0.071920      | 0.075171      |
| -0.626314           | -0.361792 | 0.000000 | 12   | 0.103725                        | 0.103262           | 0.092495      | 0.099992      |
| -2.775492           | -0.138249 | 0.000000 | 1    | 0.169963                        | 0.169103           | 0.156640      | 0.167067      |
| -0.622297           | -1.821058 | 0.000000 | 12   | 0.063512                        | 0.062595           | 0.039062      | 0.070434      |
| 0.626314            | -2.510150 | 0.000000 | 12   | 0.085380                        | 0.086046           | 0.048417      | 0.081470      |
| 1.823185            | -0.372771 | 0.000000 | 12   | -0.175730                       | -0.173497          | -0.151454     | -0.170566     |
| 1.826515            | -1.758410 | 0.000000 | 12   | -0.071368                       | -0.071609          | -0.036868     | -0.067648     |
| 2.775492            | 0.138249  | 0.000000 | 1    | 0.167638                        | 0.166251           | 0.154351      | 0.163229      |
| 2.773942            | -2.286613 | 0.000000 | 1    | 0.159934                        | 0.159475           | 0.144827      | 0.156379      |
| -1.794618           | -2.594647 | 0.000000 | 12   | -0.167742                       | -0.165352          | -0.132664     | -0.167919     |
| -1.741054           | -3.989607 | 0.000000 | 12   | -0.046507                       | -0.046271          | -0.039479     | -0.044288     |
| -2.768476           | -2.124518 | 0.000000 | 1    | 0.158213                        | 0.156789           | 0.145261      | 0.155016      |
| 0.661378            | -3.923861 | 0.000000 | 12   | -0.129534                       | -0.127974          | -0.097242     | -0.124215     |
| -0.513905           | -4.660058 | 0.000000 | 12   | -0.108498                       | -0.106462          | -0.093478     | -0.098960     |
| -2.665594           | -4.554457 | 0.000000 | 1    | 0.152478                        | 0.151251           | 0.141543      | 0.148945      |
| 1.622945            | -4.424745 | 0.000000 | 1    | 0.159094                        | 0.157709           | 0.145490      | 0.153885      |
| -0.482340           | -5.742433 | 0.000000 | 1    | 0.164310                        | 0.162657           | 0.151623      | 0.158589      |

| Triphenylene        |           |           |      |                                 |                    |               |               |
|---------------------|-----------|-----------|------|---------------------------------|--------------------|---------------|---------------|
| Atom Orientation    |           |           |      | Electrostatic Potential Charges |                    |               |               |
| Coordinates (x,y,z) |           |           | Mass | b3lyp/6-31+G(d)                 | b3lyp/6-31++G(d,p) | b3lyp/cc-pvdz | b3lyp/cc-pvtz |
| -1.273092           | -0.670520 | 0.000014  | 12   | 0.068220                        | 0.069755           | 0.057524      | 0.076491      |
| -0.048365           | -1.439474 | 0.000032  | 12   | 0.142054                        | 0.135152           | 0.120133      | 0.133372      |
| 1.241470            | -0.753819 | 0.000004  | 12   | -0.000679                       | 0.004151           | -0.009315     | 0.006606      |
| 1.291718            | 0.663677  | -0.000019 | 12   | 0.009009                        | 0.008377           | -0.007169     | 0.008974      |
| 0.056572            | 1.438144  | -0.000020 | 12   | 0.141833                        | 0.135586           | 0.121611      | 0.134414      |
| -1.222589           | 0.757302  | -0.000015 | 12   | 0.097113                        | 0.100632           | 0.084549      | 0.100070      |
| -2.417524           | 1.545790  | -0.000032 | 12   | -0.177275                       | -0.177139          | -0.151064     | -0.175202     |
| -2.372677           | 2.914077  | -0.000046 | 12   | -0.099379                       | -0.098798          | -0.089283     | -0.098597     |
| -3.382223           | 1.062257  | -0.000035 | 1    | 0.165651                        | 0.165031           | 0.154553      | 0.162435      |
| 0.058152            | 2.842559  | -0.000029 | 12   | -0.237513                       | -0.230327          | -0.204344     | -0.229952     |
| -1.120120           | 3.570264  | -0.000041 | 12   | 0.013298                        | 0.013739           | 0.021669      | 0.022774      |
| -3.288067           | 3.492314  | -0.000059 | 1    | 0.161581                        | 0.160558           | 0.150710      | 0.158457      |
| 0.990557            | 3.387234  | -0.000025 | 1    | 0.171311                        | 0.167835           | 0.157530      | 0.165267      |
| -1.079591           | 4.653185  | -0.000048 | 1    | 0.149084                        | 0.147798           | 0.138263      | 0.143576      |
| 2.552439            | 1.294007  | -0.000045 | 12   | -0.101222                       | -0.100288          | -0.074466     | -0.101807     |
| 2.452387            | -1.470312 | -0.000005 | 12   | -0.105540                       | -0.107554          | -0.081311     | -0.107986     |
| 3.740175            | 0.563577  | -0.000050 | 12   | -0.098629                       | -0.096662          | -0.085805     | -0.089398     |
| 2.622907            | 2.372191  | -0.000065 | 1    | 0.149635                        | 0.149556           | 0.138645      | 0.147651      |
| 3.690073            | -0.824944 | -0.000031 | 12   | -0.082485                       | -0.080101          | -0.071402     | -0.074884     |
| 2.446986            | -2.550812 | 0.000005  | 1    | 0.150487                        | 0.151188           | 0.139794      | 0.148282      |
| 4.690690            | 1.082393  | -0.000071 | 1    | 0.161264                        | 0.159367           | 0.148999      | 0.155056      |
| 4.600948            | -1.410714 | -0.000037 | 1    | 0.158644                        | 0.156841           | 0.147073      | 0.153067      |
| -2.522054           | -1.370968 | 0.000033  | 12   | -0.149444                       | -0.148925          | -0.125835     | -0.156175     |
| -0.146657           | -2.838394 | 0.000078  | 12   | -0.225817                       | -0.219317          | -0.194326     | -0.222144     |
| -2.576697           | -2.739865 | 0.000073  | 12   | -0.120578                       | -0.118745          | -0.107216     | -0.111851     |
| -3.449012           | -0.818631 | 0.000018  | 1    | 0.161986                        | 0.160539           | 0.150597      | 0.160191      |
| -1.375733           | -3.482011 | 0.000097  | 12   | 0.015315                        | 0.016033           | 0.023272      | 0.024590      |
| 0.744457            | -3.448454 | 0.000101  | 1    | 0.167545                        | 0.164006           | 0.154446      | 0.163176      |
| -3.531447           | -3.250377 | 0.000087  | 1    | 0.164754                        | 0.163381           | 0.153263      | 0.159853      |
| -1.411070           | -4.565130 | 0.000132  | 1    | 0.149776                        | 0.148331           | 0.138905      | 0.143695      |

| Benzo(a)pyrene      |           |           |      |                                 |                    |               |               |
|---------------------|-----------|-----------|------|---------------------------------|--------------------|---------------|---------------|
| Atom Orientation    |           |           |      | Electrostatic Potential Charges |                    |               |               |
| Coordinates (x,y,z) |           |           | Mass | b3lyp/6-31+G(d)                 | b3lyp/6-31++G(d,p) | b3lyp/cc-pvdz | b3lyp/cc-pvtz |
| 4.796228            | 0.159178  | 0.000000  | 12   | -0.124474                       | -0.115664          | -0.105783     | -0.110029     |
| 3.845803            | 1.152244  | -0.000001 | 12   | -0.146557                       | -0.153634          | -0.103013     | -0.145555     |
| 2.457279            | 0.842092  | -0.000001 | 12   | 0.235519                        | 0.191258           | 0.061822      | 0.137478      |
| 2.042089            | -0.531413 | 0.000000  | 12   | -0.019517                       | -0.008961          | 0.052175      | 0.057250      |
| 3.054702            | -1.527802 | 0.000003  | 12   | -0.173819                       | -0.171379          | -0.143668     | -0.170686     |
| 4.392496            | -1.196161 | 0.000003  | 12   | -0.031961                       | -0.031443          | -0.032807     | -0.037905     |
| 1.486002            | 1.870081  | -0.000002 | 12   | -0.314309                       | -0.254521          | -0.106370     | -0.192645     |
| 0.631761            | -0.835902 | -0.000001 | 12   | 0.151634                        | 0.153083           | 0.077919      | 0.090158      |
| -0.313418           | 0.223213  | 0.000000  | 12   | -0.107962                       | -0.088734          | -0.050787     | -0.071998     |
| 0.129930            | 1.595607  | -0.000001 | 12   | 0.249729                        | 0.225905           | 0.123312      | 0.185778      |
| -0.858126           | 2.646164  | 0.000000  | 12   | -0.161176                       | -0.166286          | -0.150314     | -0.181156     |
| -0.507538           | 3.675483  | 0.000000  | 1    | 0.167909                        | 0.171534           | 0.159049      | 0.171391      |
| -2.186442           | 2.370175  | 0.000000  | 12   | -0.178704                       | -0.195879          | -0.086075     | -0.114602     |
| -2.668383           | 1.011161  | 0.000000  | 12   | 0.144324                        | 0.187016           | 0.054615      | 0.086813      |
| -1.716004           | -0.056261 | 0.000000  | 12   | 0.078681                        | 0.036392           | 0.075574      | 0.088852      |
| 1.821662            | 2.905141  | -0.000002 | 1    | 0.192514                        | 0.174953           | 0.145515      | 0.162460      |
| 5.853349            | 0.410309  | 0.000000  | 1    | 0.162298                        | 0.160397           | 0.152057      | 0.159237      |
| 4.140936            | 2.198944  | -0.000002 | 1    | 0.153017                        | 0.162252           | 0.146182      | 0.159444      |
| 2.780428            | -2.576971 | 0.000005  | 1    | 0.155963                        | 0.155197           | 0.143102      | 0.151837      |
| 5.142528            | -1.982390 | 0.000005  | 1    | 0.148769                        | 0.146749           | 0.141064      | 0.147854      |
| -2.917696           | 3.174940  | 0.000000  | 1    | 0.178316                        | 0.181767           | 0.149844      | 0.161643      |
| 0.133166            | -2.178530 | -0.000002 | 12   | -0.148402                       | -0.166400          | -0.139450     | -0.161902     |
| -2.177727           | -1.405779 | -0.000001 | 12   | 0.123826                        | 0.161644           | 0.022356      | 0.062525      |
| -1.204925           | -2.451790 | -0.000002 | 12   | -0.190002                       | -0.179001          | -0.085041     | -0.111723     |
| 0.831731            | -3.007579 | -0.000004 | 1    | 0.162113                        | 0.166422           | 0.150863      | 0.161236      |
| -1.550244           | -3.482930 | -0.000004 | 1    | 0.181592                        | 0.175453           | 0.148163      | 0.158462      |
| -3.563988           | -1.662845 | 0.000000  | 12   | -0.123536                       | -0.163397          | -0.045502     | -0.092865     |
| -4.477369           | -0.618056 | 0.000000  | 12   | -0.081955                       | -0.053199          | -0.123917     | -0.107087     |
| -3.909184           | -2.693882 | 0.000000  | 1    | 0.155264                        | 0.162590           | 0.141003      | 0.153730      |
| -4.034264           | 0.708972  | 0.000002  | 12   | -0.155862                       | -0.176692          | -0.075488     | -0.116505     |
| -5.543184           | -0.829734 | 0.000002  | 1    | 0.153152                        | 0.148992           | 0.156662      | 0.160453      |
| -4.755645           | 1.522578  | 0.000002  | 1    | 0.163615                        | 0.163589           | 0.146936      | 0.158057      |



| Benzo(e)pyrene      |           |          |      |                                 |                    |               |               |
|---------------------|-----------|----------|------|---------------------------------|--------------------|---------------|---------------|
| Atom Orientation    |           |          |      | Electrostatic Potential Charges |                    |               |               |
| Coordinates (x,y,z) |           |          | Mass | b3lyp/6-31+G(d)                 | b3lyp/6-31++G(d,p) | b3lyp/cc-pvdz | b3lyp/cc-pvtz |
| 0.918616            | 3.541029  | 0.000000 | 12   | -0.154646                       | -0.149487          | -0.143835     | -0.134139     |
| 2.110852            | 2.836303  | 0.000000 | 12   | -0.089873                       | -0.091825          | -0.057209     | -0.093323     |
| 2.105896            | 1.415616  | 0.000000 | 12   | 0.100795                        | 0.104958           | 0.071258      | 0.107947      |
| 0.863876            | 0.713162  | 0.000000 | 12   | 0.027303                        | 0.024055           | 0.016884      | 0.017701      |
| -0.357442           | 1.435676  | 0.000000 | 12   | -0.007390                       | -0.003971          | -0.002173     | 0.006681      |
| -0.293555           | 2.853643  | 0.000000 | 12   | -0.031797                       | -0.034744          | -0.015549     | -0.048091     |
| 3.320897            | 0.690883  | 0.000000 | 12   | -0.129702                       | -0.130033          | -0.099693     | -0.126368     |
| 0.863876            | -0.713162 | 0.000000 | 12   | 0.027302                        | 0.024055           | 0.016884      | 0.017701      |
| 2.105896            | -1.415616 | 0.000000 | 12   | 0.100795                        | 0.104958           | 0.071258      | 0.107947      |
| 3.320897            | -0.690883 | 0.000000 | 12   | -0.129702                       | -0.130033          | -0.099693     | -0.126368     |
| 2.110852            | -2.836303 | 0.000000 | 12   | -0.089873                       | -0.091826          | -0.057209     | -0.093323     |
| 3.060287            | -3.359621 | 0.000000 | 1    | 0.159779                        | 0.159054           | 0.146078      | 0.155828      |
| 0.918616            | -3.541029 | 0.000000 | 12   | -0.154646                       | -0.149487          | -0.143835     | -0.134139     |
| -0.293555           | -2.853643 | 0.000000 | 12   | -0.031797                       | -0.034744          | -0.015549     | -0.048091     |
| -0.357442           | -1.435676 | 0.000000 | 12   | -0.007390                       | -0.003971          | -0.002172     | 0.006681      |
| 4.259086            | 1.233935  | 0.000000 | 1    | 0.166986                        | 0.166368           | 0.151994      | 0.162772      |
| 0.922347            | 4.623677  | 0.000000 | 1    | 0.171347                        | 0.169326           | 0.159399      | 0.164444      |
| 3.060287            | 3.359621  | 0.000000 | 1    | 0.159779                        | 0.159054           | 0.146078      | 0.155828      |
| -1.205294           | 3.433856  | 0.000000 | 1    | 0.140781                        | 0.140459           | 0.132193      | 0.141437      |
| 4.259086            | -1.233935 | 0.000000 | 1    | 0.166986                        | 0.166368           | 0.151994      | 0.162772      |
| 0.922347            | -4.623677 | 0.000000 | 1    | 0.171347                        | 0.169326           | 0.159399      | 0.164444      |
| -1.205294           | -3.433856 | 0.000000 | 1    | 0.140781                        | 0.140459           | 0.132193      | 0.141437      |
| -1.616263           | -0.720153 | 0.000000 | 12   | 0.105849                        | 0.104168           | 0.083335      | 0.104144      |
| -1.616263           | 0.720153  | 0.000000 | 12   | 0.105849                        | 0.104168           | 0.083336      | 0.104144      |
| -2.860371           | 1.395653  | 0.000000 | 12   | -0.211586                       | -0.207700          | -0.181450     | -0.206729     |
| -4.051445           | 0.704932  | 0.000000 | 12   | -0.064806                       | -0.064380          | -0.053187     | -0.060168     |
| -2.892828           | 2.475424  | 0.000000 | 1    | 0.163785                        | 0.161773           | 0.150439      | 0.158647      |
| -2.860371           | -1.395653 | 0.000000 | 12   | -0.211586                       | -0.207699          | -0.181450     | -0.206729     |
| -4.051445           | -0.704933 | 0.000000 | 12   | -0.064806                       | -0.064381          | -0.053187     | -0.060168     |
| -4.989961           | 1.245777  | 0.000000 | 1    | 0.153175                        | 0.151979           | 0.141515      | 0.149216      |
| -2.892828           | -2.475424 | 0.000000 | 1    | 0.163786                        | 0.161774           | 0.150439      | 0.158647      |
| -4.989961           | -1.245779 | 0.000000 | 1    | 0.153175                        | 0.151979           | 0.141515      | 0.149216      |

| Benzo(b)fluoranthene |           |          |      |                                 |                    |               |               |
|----------------------|-----------|----------|------|---------------------------------|--------------------|---------------|---------------|
| Atom Orientation     |           |          |      | Electrostatic Potential Charges |                    |               |               |
| Coordinates (x,y,z)  |           |          | Mass | b3lyp/6-31+G(d)                 | b3lyp/6-31++G(d,p) | b3lyp/cc-pvdz | b3lyp/cc-pvtz |
| -4.360667            | -1.644471 | 0.000000 | 12   | -0.147232                       | -0.145233          | -0.134480     | -0.136029     |
| -3.058663            | -2.091313 | 0.000000 | 12   | -0.076495                       | -0.077721          | -0.052668     | -0.093147     |
| -1.963847            | -1.174449 | 0.000000 | 12   | -0.020687                       | -0.013328          | -0.028023     | 0.028588      |
| -2.231907            | 0.248739  | 0.000000 | 12   | 0.227948                        | 0.221301           | 0.176102      | 0.183903      |
| -3.561786            | 0.662107  | 0.000000 | 12   | -0.216305                       | -0.212000          | -0.175736     | -0.198066     |
| -4.610443            | -0.263513 | 0.000000 | 12   | 0.005736                        | 0.006467           | 0.014705      | 0.008459      |
| -0.647054            | -1.677001 | 0.000000 | 12   | -0.017066                       | -0.021499          | -0.018421     | -0.057361     |
| -1.105231            | 1.179013  | 0.000000 | 12   | -0.121898                       | -0.118130          | -0.081995     | -0.077430     |
| 0.169825             | 0.613264  | 0.000000 | 12   | 0.258466                        | 0.257755           | 0.155499      | 0.211899      |
| 0.435083             | -0.785803 | 0.000000 | 12   | -0.125218                       | -0.124318          | -0.033018     | -0.077615     |
| 1.376956             | 1.345556  | 0.000000 | 12   | -0.181971                       | -0.182486          | -0.110995     | -0.146356     |
| 1.310157             | 2.724113  | 0.000000 | 12   | -0.060628                       | -0.060613          | -0.065762     | -0.076826     |
| 0.031042             | 3.325435  | 0.000001 | 12   | -0.105114                       | -0.100439          | -0.082076     | -0.078075     |
| -1.151943            | 2.587217  | 0.000000 | 12   | -0.113773                       | -0.116052          | -0.101885     | -0.138236     |
| -0.491854            | -2.750462 | 0.000000 | 1    | 0.146420                        | 0.147102           | 0.139035      | 0.149476      |
| -5.184298            | -2.346861 | 0.000000 | 1    | 0.166736                        | 0.165186           | 0.155450      | 0.161743      |
| -2.841822            | -3.153570 | 0.000000 | 1    | 0.150919                        | 0.150144           | 0.138900      | 0.151029      |
| -3.799909            | 1.718033  | 0.000000 | 1    | 0.169156                        | 0.167369           | 0.153830      | 0.162024      |
| -5.632474            | 0.097110  | 0.000000 | 1    | 0.151879                        | 0.150453           | 0.140356      | 0.146904      |
| 2.196816             | 3.346395  | 0.000000 | 1    | 0.155152                        | 0.154285           | 0.145847      | 0.153309      |
| -0.033371            | 4.407233  | 0.000001 | 1    | 0.158634                        | 0.156403           | 0.145771      | 0.150498      |
| -2.095971            | 3.116898  | 0.000001 | 1    | 0.153464                        | 0.153112           | 0.142410      | 0.154792      |
| 2.468575             | 0.342819  | 0.000000 | 12   | 0.136418                        | 0.136417           | 0.101052      | 0.123046      |
| 1.871985             | -0.957288 | 0.000000 | 12   | 0.141806                        | 0.141715           | 0.066083      | 0.118964      |
| 3.839693             | 0.468098  | 0.000000 | 12   | -0.162188                       | -0.161175          | -0.133101     | -0.153358     |
| 2.661942             | -2.110215 | 0.000001 | 12   | -0.123341                       | -0.122792          | -0.081765     | -0.116154     |
| 4.631565             | -0.706252 | 0.000000 | 12   | -0.023241                       | -0.021492          | -0.013815     | -0.020232     |
| 4.319691             | 1.439484  | 0.000000 | 1    | 0.165396                        | 0.164332           | 0.152127      | 0.160003      |
| 4.054249             | -1.971805 | 0.000000 | 12   | -0.154846                       | -0.151545          | -0.140720     | -0.143908     |
| 2.211419             | -3.096062 | 0.000001 | 1    | 0.159054                        | 0.158053           | 0.143712      | 0.154797      |
| 5.710959             | -0.611093 | 0.000000 | 1    | 0.142267                        | 0.140451           | 0.133714      | 0.138615      |
| 4.683632             | -2.852613 | 0.000000 | 1    | 0.160551                        | 0.158278           | 0.149867      | 0.154744      |

| Benzo(k)fluoranthene |           |           |      |                                 |                    |               |               |
|----------------------|-----------|-----------|------|---------------------------------|--------------------|---------------|---------------|
| Atom Orientation     |           |           |      | Electrostatic Potential Charges |                    |               |               |
| Coordinates (x,y,z)  |           |           | Mass | b3lyp/6-31+G(d)                 | b3lyp/6-31++G(d,p) | b3lyp/cc-pvdz | b3lyp/cc-pvtz |
| 0.000000             | 2.435910  | 3.273551  | 12   | -0.110455                       | -0.085483          | -0.094517     | -0.072489     |
| 0.000000             | 1.272549  | 4.045102  | 12   | -0.126911                       | -0.144054          | -0.096401     | -0.150578     |
| 0.000000             | 2.407246  | 1.867231  | 12   | -0.097480                       | -0.129897          | -0.091865     | -0.130109     |
| 0.000000             | 0.000000  | 3.419236  | 12   | 0.100168                        | 0.091488           | 0.048101      | 0.110847      |
| 0.000000             | 0.000000  | 2.017545  | 12   | 0.115130                        | 0.142156           | 0.116489      | 0.112406      |
| 0.000000             | 1.169349  | 1.224059  | 12   | -0.013349                       | 0.043746           | 0.024220      | 0.043871      |
| 0.000000             | -1.169349 | 1.224059  | 12   | -0.013349                       | 0.043745           | 0.024219      | 0.043871      |
| 0.000000             | -2.407246 | 1.867231  | 12   | -0.097480                       | -0.129897          | -0.091864     | -0.130109     |
| 0.000000             | -2.435910 | 3.273551  | 12   | -0.110455                       | -0.085484          | -0.094518     | -0.072489     |
| 0.000000             | -1.272549 | 4.045102  | 12   | -0.126911                       | -0.144054          | -0.096401     | -0.150579     |
| 0.000000             | 3.338434  | 1.312810  | 1    | 0.157264                        | 0.160641           | 0.147509      | 0.158576      |
| 0.000000             | -3.338434 | 1.312810  | 1    | 0.157264                        | 0.160641           | 0.147509      | 0.158576      |
| 0.000000             | -3.396006 | 3.775253  | 1    | 0.156618                        | 0.149800           | 0.144697      | 0.145902      |
| 0.000000             | -1.345981 | 5.126815  | 1    | 0.162377                        | 0.166080           | 0.151199      | 0.164379      |
| 0.000000             | -0.721617 | -0.163977 | 12   | 0.069314                        | -0.023375          | -0.016261     | -0.004954     |
| 0.000000             | 0.721617  | -0.163977 | 12   | 0.069314                        | -0.023375          | -0.016261     | -0.004953     |
| 0.000000             | -1.419888 | -1.354378 | 12   | -0.221112                       | -0.102795          | -0.067710     | -0.122662     |
| 0.000000             | 1.419888  | -1.354378 | 12   | -0.221112                       | -0.102795          | -0.067711     | -0.122662     |
| 0.000000             | -0.716225 | -2.595672 | 12   | 0.156412                        | 0.088022           | 0.049623      | 0.098719      |
| 0.000000             | -2.504711 | -1.366889 | 1    | 0.181288                        | 0.157888           | 0.144870      | 0.158209      |
| 0.000000             | 0.716225  | -2.595672 | 12   | 0.156412                        | 0.088021           | 0.049623      | 0.098719      |
| 0.000000             | 2.504711  | -1.366889 | 1    | 0.181288                        | 0.157888           | 0.144870      | 0.158209      |
| 0.000000             | -1.398524 | -3.825520 | 12   | -0.147554                       | -0.121179          | -0.089094     | -0.124563     |
| 0.000000             | 1.398524  | -3.825520 | 12   | -0.147554                       | -0.121179          | -0.089094     | -0.124563     |
| 0.000000             | -0.698041 | -5.030544 | 12   | -0.081824                       | -0.087772          | -0.076277     | -0.083144     |
| 0.000000             | -2.482836 | -3.829265 | 1    | 0.153711                        | 0.152869           | 0.139913      | 0.151620      |
| 0.000000             | 0.698041  | -5.030544 | 12   | -0.081824                       | -0.087773          | -0.076278     | -0.083144     |
| 0.000000             | 2.482836  | -3.829265 | 1    | 0.153711                        | 0.152869           | 0.139913      | 0.151620      |
| 0.000000             | -1.240139 | -5.968174 | 1    | 0.154052                        | 0.158690           | 0.147801      | 0.155595      |
| 0.000000             | 1.240139  | -5.968174 | 1    | 0.154052                        | 0.158690           | 0.147801      | 0.155595      |
| 0.000000             | 1.345981  | 5.126815  | 1    | 0.162377                        | 0.166080           | 0.151199      | 0.164379      |
| 0.000000             | 3.396006  | 3.775253  | 1    | 0.156618                        | 0.149800           | 0.144697      | 0.145902      |

| Perylene            |           |           |      |                                 |                    |               |               |
|---------------------|-----------|-----------|------|---------------------------------|--------------------|---------------|---------------|
| Atom Orientation    |           |           |      | Electrostatic Potential Charges |                    |               |               |
| Coordinates (x,y,z) |           |           | Mass | b3lyp/6-31+G(d)                 | b3lyp/6-31++G(d,p) | b3lyp/cc-pvdz | b3lyp/cc-pvtz |
| 0.738169            | 1.249810  | 0.000000  | 12   | -0.002022                       | -0.009478          | 0.009164      | 0.020930      |
| -0.738171           | 1.249819  | 0.000000  | 12   | -0.006527                       | 0.007243           | -0.004032     | 0.009207      |
| -1.439330           | -0.000011 | 0.000000  | 12   | 0.121748                        | 0.104796           | 0.089078      | 0.075822      |
| -0.738179           | -1.249821 | 0.000000  | 12   | -0.002518                       | 0.007244           | -0.004031     | 0.009207      |
| 0.738171            | -1.249820 | 0.000000  | 12   | -0.006005                       | -0.009478          | 0.009164      | 0.020930      |
| 1.439330            | 0.000001  | 0.000000  | 12   | 0.104725                        | 0.105815           | 0.087772      | 0.075328      |
| 1.479612            | -2.427539 | 0.000010  | 12   | -0.085789                       | -0.087539          | -0.082497     | -0.109376     |
| 2.874760            | 0.000002  | 0.000000  | 12   | 0.155117                        | 0.160962           | 0.075307      | 0.151190      |
| 2.885922            | -2.422668 | 0.000020  | 12   | -0.086937                       | -0.082204          | -0.080234     | -0.062071     |
| 0.977182            | -3.388099 | 0.000020  | 1    | 0.143136                        | 0.143025           | 0.135978      | 0.142455      |
| 3.575551            | -1.232477 | 0.000010  | 12   | -0.164057                       | -0.167639          | -0.102746     | -0.159390     |
| 3.421382            | -3.368167 | 0.000020  | 1    | 0.151485                        | 0.150379           | 0.142282      | 0.144180      |
| 4.662511            | -1.217906 | 0.000010  | 1    | 0.167628                        | 0.167359           | 0.148646      | 0.162032      |
| 3.575539            | 1.232483  | -0.000010 | 12   | -0.165293                       | -0.167639          | -0.102746     | -0.159391     |
| 2.885898            | 2.422682  | -0.000020 | 12   | -0.085473                       | -0.082204          | -0.080234     | -0.062071     |
| 4.662499            | 1.217924  | -0.000010 | 1    | 0.167874                        | 0.167359           | 0.148646      | 0.162032      |
| 1.479598            | 2.427541  | -0.000020 | 12   | -0.088706                       | -0.087538          | -0.082497     | -0.109377     |
| 3.421357            | 3.368183  | -0.000030 | 1    | 0.151350                        | 0.150379           | 0.142282      | 0.144180      |
| 0.977147            | 3.388091  | -0.000020 | 1    | 0.143750                        | 0.143025           | 0.135978      | 0.142455      |
| -1.479608           | -2.427551 | -0.000010 | 12   | -0.090333                       | -0.098499          | -0.073815     | -0.102438     |
| -2.874760           | -0.000003 | 0.000000  | 12   | 0.120602                        | 0.137207           | 0.092228      | 0.170323      |
| -2.885908           | -2.422673 | -0.000020 | 12   | -0.085085                       | -0.075959          | -0.085339     | -0.064828     |
| -0.977168           | -3.388091 | -0.000020 | 1    | 0.140372                        | 0.141684           | 0.136987      | 0.143241      |
| -3.575539           | -1.232473 | -0.000010 | 12   | -0.146402                       | -0.154655          | -0.111666     | -0.171048     |
| -3.421378           | -3.368173 | -0.000020 | 1    | 0.149853                        | 0.147907           | 0.144090      | 0.145796      |
| -4.662509           | -1.217924 | -0.000010 | 1    | 0.163560                        | 0.163985           | 0.150991      | 0.164980      |
| -3.575541           | 1.232487  | 0.000010  | 12   | -0.145177                       | -0.154655          | -0.111666     | -0.171048     |
| -2.885912           | 2.422667  | 0.000020  | 12   | -0.086549                       | -0.075959          | -0.085339     | -0.064828     |
| -4.662511           | 1.217916  | 0.000010  | 1    | 0.163318                        | 0.163985           | 0.150991      | 0.164980      |
| -1.479592           | 2.427539  | 0.000020  | 12   | -0.087379                       | -0.098498          | -0.073816     | -0.102438     |
| -3.421363           | 3.368177  | 0.000030  | 1    | 0.149983                        | 0.147907           | 0.144090      | 0.145796      |
| -0.977163           | 3.388089  | 0.000020  | 1    | 0.139752                        | 0.141684           | 0.136987      | 0.143241      |

| Benzo(g,h,i)perylene |           |           |      |                                 |                    |               |               |
|----------------------|-----------|-----------|------|---------------------------------|--------------------|---------------|---------------|
| Atom Orientation     |           |           |      | Electrostatic Potential Charges |                    |               |               |
| Coordinates (x,y,z)  |           |           | Mass | b3lyp/6-31+G(d)                 | b3lyp/6-31++G(d,p) | b3lyp/cc-pvdz | b3lyp/cc-pvtz |
| 0.000000             | 0.707729  | 0.893208  | 12   | -0.076290                       | -0.075752          | -0.056792     | -0.064862     |
| 0.000000             | -0.707729 | 0.893208  | 12   | -0.076290                       | -0.075752          | -0.056792     | -0.064862     |
| 0.000000             | -1.420312 | -0.340910 | 12   | 0.108300                        | 0.104311           | 0.090456      | 0.082882      |
| 0.000000             | -0.723561 | -1.583487 | 12   | 0.027888                        | 0.030194           | 0.022031      | 0.043165      |
| 0.000000             | 0.723561  | -1.583487 | 12   | 0.027888                        | 0.030194           | 0.022031      | 0.043165      |
| 0.000000             | 1.420312  | -0.340910 | 12   | 0.108300                        | 0.104312           | 0.090456      | 0.082882      |
| 0.000000             | 1.487431  | -2.779333 | 12   | -0.125773                       | -0.128562          | -0.100418     | -0.139982     |
| 0.000000             | 2.845812  | -0.322244 | 12   | 0.087508                        | 0.092459           | 0.046940      | 0.101287      |
| 0.000000             | 2.874927  | -2.756873 | 12   | -0.099598                       | -0.092311          | -0.097855     | -0.077093     |
| 0.000000             | 0.990392  | -3.739395 | 1    | 0.154875                        | 0.154497           | 0.144998      | 0.154808      |
| 0.000000             | 3.555441  | -1.540762 | 12   | -0.100637                       | -0.104623          | -0.064334     | -0.110846     |
| 0.000000             | 3.428039  | -3.687810 | 1    | 0.152579                        | 0.149782           | 0.144468      | 0.145851      |
| 0.000000             | 4.639556  | -1.522321 | 1    | 0.149494                        | 0.149168           | 0.138011      | 0.148201      |
| 0.000000             | 3.525205  | 0.927493  | 12   | -0.123807                       | -0.124533          | -0.090384     | -0.125467     |
| 0.000000             | 2.830493  | 2.118770  | 12   | -0.224875                       | -0.222582          | -0.183349     | -0.206223     |
| 0.000000             | 4.609441  | 0.932124  | 1    | 0.166384                        | 0.165799           | 0.151285      | 0.163196      |
| 0.000000             | 1.417412  | 2.133874  | 12   | 0.265710                        | 0.264672           | 0.209862      | 0.247119      |
| 0.000000             | 3.367860  | 3.060169  | 1    | 0.175601                        | 0.174280           | 0.159945      | 0.168948      |
| 0.000000             | -1.487431 | -2.779333 | 12   | -0.125773                       | -0.128562          | -0.100418     | -0.139982     |
| 0.000000             | -2.845812 | -0.322244 | 12   | 0.087508                        | 0.092459           | 0.046940      | 0.101287      |
| 0.000000             | -2.874927 | -2.756873 | 12   | -0.099598                       | -0.092311          | -0.097854     | -0.077093     |
| 0.000000             | -0.990392 | -3.739395 | 1    | 0.154875                        | 0.154497           | 0.144998      | 0.154808      |
| 0.000000             | -3.555441 | -1.540762 | 12   | -0.100637                       | -0.104623          | -0.064334     | -0.110846     |
| 0.000000             | -3.428039 | -3.687810 | 1    | 0.152579                        | 0.149782           | 0.144468      | 0.145851      |
| 0.000000             | -4.639556 | -1.522321 | 1    | 0.149494                        | 0.149168           | 0.138011      | 0.148201      |
| 0.000000             | -3.525205 | 0.927493  | 12   | -0.123807                       | -0.124533          | -0.090384     | -0.125467     |
| 0.000000             | -2.830493 | 2.118770  | 12   | -0.224875                       | -0.222582          | -0.183349     | -0.206223     |
| 0.000000             | -4.609441 | 0.932124  | 1    | 0.166384                        | 0.165799           | 0.151285      | 0.163196      |
| 0.000000             | -1.417412 | 2.133874  | 12   | 0.265710                        | 0.264672           | 0.209862      | 0.247119      |
| 0.000000             | -3.367860 | 3.060169  | 1    | 0.175601                        | 0.174280           | 0.159945      | 0.168948      |
| 0.000000             | -0.682634 | 3.360630  | 12   | -0.211540                       | -0.209662          | -0.174971     | -0.199723     |
| 0.000000             | 0.682634  | 3.360630  | 12   | -0.211540                       | -0.209662          | -0.174971     | -0.199723     |
| 0.000000             | -1.231869 | 4.295037  | 1    | 0.174180                        | 0.172863           | 0.160107      | 0.168739      |
| 0.000000             | 1.231869  | 4.295037  | 1    | 0.174180                        | 0.172863           | 0.160107      | 0.168739      |

| Indeno(1,2,3-cd)pyrene |           |          |      |                                 |                    |               |               |
|------------------------|-----------|----------|------|---------------------------------|--------------------|---------------|---------------|
| Atom Orientation       |           |          |      | Electrostatic Potential Charges |                    |               |               |
| Coordinates (x,y,z)    |           |          | Mass | b3lyp/6-31+G(d)                 | b3lyp/6-31++G(d,p) | b3lyp/cc-pvdz | b3lyp/cc-pvtz |
| -2.400937              | 1.870922  | 0.000000 | 12   | -0.173392                       | -0.172915          | -0.124664     | -0.101851     |
| 0.000000               | 0.524190  | 0.000000 | 12   | 0.322586                        | 0.324939           | 0.228237      | 0.058845      |
| 0.010670               | 1.950039  | 0.000000 | 12   | -0.145856                       | -0.148120          | -0.053361     | 0.128940      |
| -1.226943              | 2.617629  | 0.000000 | 12   | -0.078982                       | -0.076414          | -0.100134     | -0.195521     |
| -3.353775              | 2.389093  | 0.000000 | 1    | 0.168587                        | 0.167527           | 0.153949      | 0.159536      |
| -1.283196              | 3.699254  | 0.000000 | 1    | 0.163190                        | 0.162130           | 0.156018      | 0.175679      |
| -1.158148              | -0.233379 | 0.000000 | 12   | -0.192421                       | -0.192292          | -0.150492     | -0.036385     |
| -1.032069              | -1.636910 | 0.000000 | 12   | 0.175678                        | 0.168638           | 0.134772      | 0.040625      |
| -2.410218              | 0.435275  | 0.000000 | 12   | 0.229806                        | 0.230053           | 0.177893      | 0.125856      |
| -2.212352              | -2.425971 | 0.000000 | 12   | -0.024105                       | -0.014969          | -0.023762     | 0.082946      |
| -3.571090              | -0.370244 | 0.000000 | 12   | -0.206489                       | -0.204221          | -0.165676     | -0.146168     |
| -3.468261              | -1.756535 | 0.000000 | 12   | -0.047229                       | -0.050274          | -0.034491     | -0.104539     |
| -4.550948              | 0.093580  | 0.000000 | 1    | 0.173706                        | 0.172619           | 0.157793      | 0.161063      |
| -4.373873              | -2.353228 | 0.000000 | 1    | 0.153383                        | 0.153288           | 0.141627      | 0.158012      |
| 1.304766               | -0.020311 | 0.000000 | 12   | -0.229733                       | -0.229351          | -0.143021     | 0.063871      |
| 1.440296               | -1.392533 | 0.000000 | 12   | -0.077424                       | -0.079905          | -0.072052     | -0.224556     |
| 2.413646               | -1.871174 | 0.000000 | 1    | 0.159562                        | 0.159889           | 0.149612      | 0.174870      |
| 0.266936               | -2.223292 | 0.000000 | 12   | 0.013354                        | 0.018787           | -0.003047     | 0.107445      |
| 0.338849               | -3.634946 | 0.000000 | 12   | -0.083621                       | -0.085817          | -0.046042     | -0.094789     |
| -0.815862              | -4.419101 | 0.000000 | 12   | -0.150743                       | -0.144311          | -0.142569     | -0.127454     |
| 1.311250               | -4.115291 | 0.000000 | 1    | 0.156960                        | 0.156102           | 0.141208      | 0.153805      |
| -2.078174              | -3.833922 | 0.000000 | 12   | -0.051465                       | -0.057819          | -0.031439     | -0.102658     |
| -0.725968              | -5.498239 | 0.000000 | 1    | 0.168221                        | 0.165941           | 0.156690      | 0.162791      |
| -2.966034              | -4.456252 | 0.000000 | 1    | 0.150645                        | 0.150873           | 0.139174      | 0.156130      |
| 1.409120               | 2.339274  | 0.000000 | 12   | 0.117349                        | 0.116635           | 0.059138      | -0.036052     |
| 2.009064               | 3.600640  | 0.000000 | 12   | -0.134468                       | -0.132439          | -0.094996     | -0.077511     |
| 2.214081               | 1.150939  | 0.000000 | 12   | 0.218237                        | 0.216598           | 0.144650      | 0.073361      |
| 3.403131               | 3.683400  | 0.000000 | 12   | -0.154147                       | -0.150980          | -0.138151     | -0.131385     |
| 1.407732               | 4.502183  | 0.000000 | 1    | 0.162251                        | 0.160826           | 0.146685      | 0.147972      |
| 3.589649               | 1.246447  | 0.000000 | 12   | -0.247831                       | -0.244026          | -0.191881     | -0.164329     |
| 4.180715               | 2.525954  | 0.000000 | 12   | -0.008582                       | -0.008292          | -0.007212     | -0.050365     |
| 3.884135               | 4.653532  | 0.000000 | 1    | 0.158145                        | 0.155844           | 0.147540      | 0.154127      |
| 4.216645               | 0.362676  | 0.000000 | 1    | 0.176967                        | 0.175228           | 0.158147      | 0.159339      |
| 5.261052               | 2.608476  | 0.000000 | 1    | 0.137861                        | 0.136227           | 0.129859      | 0.148350      |

| 1,2,3,4- Dibenanthracene |           |           |      |                                 |                    |               |               |
|--------------------------|-----------|-----------|------|---------------------------------|--------------------|---------------|---------------|
| Atom Orientation         |           |           |      | Electrostatic Potential Charges |                    |               |               |
| Coordinates (x,y,z)      |           |           | Mass | b3lyp/6-31+G(d)                 | b3lyp/6-31++G(d,p) | b3lyp/cc-pvdz | b3lyp/cc-pvtz |
| -5.142409                | 0.701237  | 0.000000  | 12   | -0.078458                       | -0.077352          | -0.066506     | -0.072391     |
| -3.941110                | 1.404273  | 0.000002  | 12   | -0.136913                       | -0.136538          | -0.102632     | -0.140504     |
| -2.710671                | 0.713356  | 0.000000  | 12   | 0.094295                        | 0.096662           | 0.054814      | 0.106240      |
| -2.710671                | -0.713356 | -0.000002 | 12   | 0.094297                        | 0.096662           | 0.054814      | 0.106240      |
| -3.941110                | -1.404273 | -0.000003 | 12   | -0.136914                       | -0.136538          | -0.102632     | -0.140504     |
| -5.142409                | -0.701237 | -0.000002 | 12   | -0.078458                       | -0.077352          | -0.066506     | -0.072391     |
| -1.468173                | 1.384434  | 0.000002  | 12   | -0.106663                       | -0.108497          | -0.063464     | -0.119125     |
| -1.468173                | -1.384434 | -0.000002 | 12   | -0.106665                       | -0.108497          | -0.063464     | -0.119125     |
| -0.234339                | -0.716536 | -0.000001 | 12   | 0.017220                        | 0.016714           | 0.008532      | 0.017910      |
| -0.234339                | 0.716536  | 0.000000  | 12   | 0.017215                        | 0.016714           | 0.008532      | 0.017910      |
| 1.021795                 | 1.448674  | 0.000000  | 12   | 0.083519                        | 0.086040           | 0.062314      | 0.097728      |
| 2.260942                 | 0.725421  | 0.000000  | 12   | 0.078326                        | 0.075283           | 0.067409      | 0.071192      |
| 2.260942                 | -0.725421 | 0.000000  | 12   | 0.078331                        | 0.075283           | 0.067409      | 0.071192      |
| 1.021795                 | -1.448674 | -0.000001 | 12   | 0.083514                        | 0.086040           | 0.062314      | 0.097728      |
| -1.495939                | 2.465492  | 0.000004  | 1    | 0.139386                        | 0.139365           | 0.129415      | 0.139097      |
| -6.082096                | 1.240041  | 0.000000  | 1    | 0.158696                        | 0.157295           | 0.146772      | 0.154198      |
| -3.944516                | 2.488597  | 0.000004  | 1    | 0.162603                        | 0.161677           | 0.146873      | 0.160330      |
| -3.944516                | -2.488597 | -0.000005 | 1    | 0.162603                        | 0.161677           | 0.146873      | 0.160330      |
| -6.082096                | -1.240041 | -0.000004 | 1    | 0.158696                        | 0.157295           | 0.146772      | 0.154198      |
| -1.495939                | -2.465492 | -0.000004 | 1    | 0.139387                        | 0.139365           | 0.129415      | 0.139097      |
| 3.469609                 | -1.464648 | 0.000000  | 12   | -0.178279                       | -0.173928          | -0.154639     | -0.173280     |
| 3.473855                 | -2.841630 | 0.000000  | 12   | -0.087314                       | -0.085986          | -0.073370     | -0.076903     |
| 4.418799                 | -0.950548 | 0.000002  | 1    | 0.155879                        | 0.153565           | 0.144576      | 0.150593      |
| 1.061888                 | -2.862534 | -0.000001 | 12   | -0.195425                       | -0.194163          | -0.169910     | -0.202387     |
| 2.256275                 | -3.549620 | -0.000001 | 12   | -0.077364                       | -0.075726          | -0.060544     | -0.069135     |
| 4.413969                 | -3.379788 | 0.000000  | 1    | 0.158035                        | 0.156353           | 0.144944      | 0.151562      |
| 0.146247                 | -3.435788 | -0.000001 | 1    | 0.159099                        | 0.157460           | 0.145193      | 0.156748      |
| 2.257562                 | -4.632857 | -0.000001 | 1    | 0.153358                        | 0.151775           | 0.140220      | 0.148127      |
| 4.418799                 | 0.950548  | -0.000002 | 1    | 0.155878                        | 0.153565           | 0.144576      | 0.150593      |
| 3.469609                 | 1.464648  | 0.000000  | 12   | -0.178276                       | -0.173928          | -0.154639     | -0.173280     |
| 3.473855                 | 2.841630  | 0.000000  | 12   | -0.087315                       | -0.085986          | -0.073370     | -0.076903     |
| 2.256275                 | 3.549620  | 0.000002  | 12   | -0.077362                       | -0.075726          | -0.060544     | -0.069135     |
| 4.413969                 | 3.379788  | 0.000000  | 1    | 0.158035                        | 0.156353           | 0.144944      | 0.151562      |
| 1.061888                 | 2.862534  | 0.000002  | 12   | -0.195427                       | -0.194163          | -0.169910     | -0.202387     |
| 2.257562                 | 4.632857  | 0.000003  | 1    | 0.153358                        | 0.151775           | 0.140220      | 0.148127      |
| 0.146247                 | 3.435788  | 0.000003  | 1    | 0.159100                        | 0.157460           | 0.145193      | 0.156748      |

| 1,2:5,6- Dibenzanthracene |           |          |      |                                 |                    |               |               |
|---------------------------|-----------|----------|------|---------------------------------|--------------------|---------------|---------------|
| Atom Orientation          |           |          |      | Electrostatic Potential Charges |                    |               |               |
| Coordinates (x,y,z)       |           |          | Mass | b3lyp/6-31+G(d)                 | b3lyp/6-31++G(d,p) | b3lyp/cc-pvdz | b3lyp/cc-pvtz |
| -0.759840                 | 3.707453  | 0.000000 | 12   | 0.050393                        | 0.206579           | 0.144635      | 0.185842      |
| 0.406771                  | 2.874334  | 0.000000 | 12   | 0.164992                        | 0.128817           | 0.105220      | 0.130065      |
| 0.229444                  | 1.427645  | 0.000000 | 12   | -0.019951                       | -0.035900          | -0.028757     | -0.031572     |
| -1.095624                 | 0.879662  | 0.000000 | 12   | 0.142587                        | 0.225169           | 0.170544      | 0.211522      |
| -2.212376                 | 1.743383  | 0.000000 | 12   | -0.188439                       | -0.189842          | -0.158049     | -0.183369     |
| -2.045408                 | 3.113555  | 0.000000 | 12   | -0.068487                       | -0.179471          | -0.122219     | -0.163195     |
| 1.285877                  | 0.525804  | 0.000000 | 12   | -0.123963                       | -0.197724          | -0.152038     | -0.186939     |
| -1.285877                 | -0.525805 | 0.000000 | 12   | -0.156218                       | -0.207448          | -0.163404     | -0.195850     |
| -0.229443                 | -1.427645 | 0.000000 | 12   | 0.025486                        | -0.008075          | -0.004137     | -0.010657     |
| 1.095625                  | -0.879662 | 0.000000 | 12   | 0.101141                        | 0.217726           | 0.159842      | 0.205574      |
| 2.212376                  | -1.743384 | 0.000000 | 12   | -0.158888                       | -0.182291          | -0.149953     | -0.178774     |
| 3.209791                  | -1.319057 | 0.000000 | 1    | 0.167097                        | 0.172506           | 0.155748      | 0.169411      |
| 2.045408                  | -3.113555 | 0.000000 | 12   | -0.110261                       | -0.201445          | -0.139358     | -0.178094     |
| 0.759840                  | -3.707453 | 0.000000 | 12   | 0.118366                        | 0.238544           | 0.168305      | 0.209230      |
| -0.406770                 | -2.874334 | 0.000000 | 12   | 0.105887                        | 0.088286           | 0.075198      | 0.100356      |
| 2.308548                  | 0.881641  | 0.000000 | 1    | 0.138379                        | 0.150333           | 0.142683      | 0.145227      |
| -3.209791                 | 1.319057  | 0.000000 | 1    | 0.168906                        | 0.174399           | 0.157503      | 0.170518      |
| -2.915892                 | 3.760378  | 0.000000 | 1    | 0.154368                        | 0.180261           | 0.159617      | 0.174020      |
| -2.308547                 | -0.881642 | 0.000000 | 1    | 0.150655                        | 0.148255           | 0.141854      | 0.144789      |
| 2.915892                  | -3.760379 | 0.000000 | 1    | 0.162637                        | 0.183304           | 0.161910      | 0.175967      |
| -1.662427                 | -3.502682 | 0.000000 | 12   | -0.213595                       | -0.199272          | -0.181180     | -0.204836     |
| 0.622927                  | -5.118954 | 0.000000 | 12   | -0.174249                       | -0.235770          | -0.189571     | -0.218527     |
| -1.769122                 | -4.884368 | 0.000000 | 12   | -0.050518                       | -0.055399          | -0.038004     | -0.046936     |
| -2.570990                 | -2.915347 | 0.000000 | 1    | 0.160566                        | 0.157240           | 0.146825      | 0.155747      |
| -0.622928                 | -5.701225 | 0.000000 | 12   | -0.110386                       | -0.051681          | -0.058994     | -0.055963     |
| 1.518934                  | -5.728997 | 0.000000 | 1    | 0.160761                        | 0.160775           | 0.149657      | 0.156165      |
| -2.751671                 | -5.341348 | 0.000000 | 1    | 0.150032                        | 0.134914           | 0.128002      | 0.133126      |
| -0.726462                 | -6.779109 | 0.000000 | 1    | 0.161236                        | 0.137601           | 0.133752      | 0.137149      |
| 1.662427                  | 3.502683  | 0.000000 | 12   | -0.246896                       | -0.216659          | -0.192254     | -0.218575     |
| 1.769121                  | 4.884368  | 0.000000 | 12   | -0.048784                       | -0.055108          | -0.039622     | -0.045025     |
| 2.570990                  | 2.915348  | 0.000000 | 1    | 0.172960                        | 0.156765           | 0.146069      | 0.156036      |
| -0.622928                 | 5.118955  | 0.000000 | 12   | -0.139039                       | -0.229424          | -0.185089     | -0.212202     |
| 0.622927                  | 5.701225  | 0.000000 | 12   | -0.109786                       | -0.046423          | -0.054367     | -0.054431     |
| 2.751670                  | 5.341350  | 0.000000 | 1    | 0.151719                        | 0.137893           | 0.130528      | 0.135036      |
| -1.518935                 | 5.728996  | 0.000000 | 1    | 0.154575                        | 0.157115           | 0.146967      | 0.153208      |
| 0.726461                  | 6.779110  | 0.000000 | 1    | 0.156716                        | 0.135447           | 0.132135      | 0.135957      |



| Pentacene           |           |           |      |                                 |                    |               |               |
|---------------------|-----------|-----------|------|---------------------------------|--------------------|---------------|---------------|
| Atom Orientation    |           |           |      | Electrostatic Potential Charges |                    |               |               |
| Coordinates (x,y,z) |           |           | Mass | b3lyp/6-31+G(d)                 | b3lyp/6-31++G(d,p) | b3lyp/cc-pvdz | b3lyp/cc-pvtz |
| 0.000000            | 0.709480  | 6.109310  | 12   | -0.066658                       | -0.064654          | -0.056704     | -0.060549     |
| 0.000000            | 1.409867  | 4.925092  | 12   | -0.227195                       | -0.225448          | -0.190588     | -0.222687     |
| 0.000000            | 0.723161  | 3.679870  | 12   | 0.229511                        | 0.229130           | 0.173839      | 0.220979      |
| 0.000000            | -0.723161 | 3.679870  | 12   | 0.229511                        | 0.229130           | 0.173839      | 0.220979      |
| 0.000000            | -1.409867 | 4.925092  | 12   | -0.227195                       | -0.225448          | -0.190588     | -0.222687     |
| 0.000000            | -0.709480 | 6.109310  | 12   | -0.066658                       | -0.064654          | -0.056704     | -0.060549     |
| 0.000000            | 1.408514  | 2.456111  | 12   | -0.329353                       | -0.328892          | -0.252344     | -0.316940     |
| 0.000000            | -1.408514 | 2.456111  | 12   | -0.329353                       | -0.328892          | -0.252344     | -0.316940     |
| 0.000000            | -0.726869 | 1.228184  | 12   | 0.174435                        | 0.174454           | 0.130317      | 0.169070      |
| 0.000000            | 0.726869  | 1.228184  | 12   | 0.174435                        | 0.174454           | 0.130317      | 0.169070      |
| 0.000000            | 1.409939  | 0.000000  | 12   | -0.244217                       | -0.243447          | -0.190919     | -0.236839     |
| 0.000000            | 2.495251  | 0.000000  | 1    | 0.181000                        | 0.180472           | 0.163090      | 0.176533      |
| 0.000000            | 0.726869  | -1.228184 | 12   | 0.174435                        | 0.174454           | 0.130317      | 0.169070      |
| 0.000000            | -0.726869 | -1.228184 | 12   | 0.174435                        | 0.174454           | 0.130317      | 0.169070      |
| 0.000000            | -1.409939 | 0.000000  | 12   | -0.244217                       | -0.243447          | -0.190919     | -0.236839     |
| 0.000000            | 2.493716  | 2.458263  | 1    | 0.188604                        | 0.188103           | 0.168659      | 0.184248      |
| 0.000000            | 1.241430  | 7.053126  | 1    | 0.147476                        | 0.145505           | 0.138422      | 0.143992      |
| 0.000000            | 2.493948  | 4.927061  | 1    | 0.164789                        | 0.163290           | 0.152314      | 0.162040      |
| 0.000000            | -2.493948 | 4.927061  | 1    | 0.164789                        | 0.163290           | 0.152314      | 0.162040      |
| 0.000000            | -1.241430 | 7.053126  | 1    | 0.147476                        | 0.145505           | 0.138422      | 0.143992      |
| 0.000000            | -2.493716 | 2.458263  | 1    | 0.188604                        | 0.188103           | 0.168659      | 0.184248      |
| 0.000000            | -2.495251 | 0.000000  | 1    | 0.181000                        | 0.180472           | 0.163090      | 0.176533      |
| 0.000000            | -1.408514 | -2.456111 | 12   | -0.329353                       | -0.328892          | -0.252344     | -0.316940     |
| 0.000000            | 1.408514  | -2.456111 | 12   | -0.329353                       | -0.328892          | -0.252344     | -0.316940     |
| 0.000000            | -0.723161 | -3.679870 | 12   | 0.229511                        | 0.229130           | 0.173839      | 0.220979      |
| 0.000000            | -2.493716 | -2.458263 | 1    | 0.188604                        | 0.188103           | 0.168659      | 0.184248      |
| 0.000000            | 0.723161  | -3.679870 | 12   | 0.229511                        | 0.229130           | 0.173839      | 0.220979      |
| 0.000000            | 2.493716  | -2.458263 | 1    | 0.188604                        | 0.188103           | 0.168659      | 0.184248      |
| 0.000000            | -1.409867 | -4.925092 | 12   | -0.227195                       | -0.225448          | -0.190588     | -0.222687     |
| 0.000000            | 1.409867  | -4.925092 | 12   | -0.227195                       | -0.225448          | -0.190588     | -0.222687     |
| 0.000000            | -0.709480 | -6.109310 | 12   | -0.066658                       | -0.064654          | -0.056704     | -0.060548     |
| 0.000000            | -2.493948 | -4.927061 | 1    | 0.164789                        | 0.163290           | 0.152314      | 0.162040      |
| 0.000000            | 0.709480  | -6.109310 | 12   | -0.066658                       | -0.064654          | -0.056704     | -0.060548     |
| 0.000000            | 2.493948  | -4.927061 | 1    | 0.164789                        | 0.163290           | 0.152314      | 0.162040      |
| 0.000000            | -1.241430 | -7.053126 | 1    | 0.147476                        | 0.145505           | 0.138422      | 0.143992      |
| 0.000000            | 1.241430  | -7.053126 | 1    | 0.147476                        | 0.145505           | 0.138422      | 0.143992      |

| Rubrene             |           |           |      |                                 |                    |               |               |
|---------------------|-----------|-----------|------|---------------------------------|--------------------|---------------|---------------|
| Atom Orientation    |           |           |      | Electrostatic Potential Charges |                    |               |               |
| Coordinates (x,y,z) |           |           | Mass | b3lyp/6-31+G(d)                 | b3lyp/6-31++G(d,p) | b3lyp/cc-pvdz | b3lyp/cc-pvtz |
| 0.647301            | 4.886807  | 0.278278  | 12   | -0.067863                       | -0.066729          | -0.062109     | -0.067214     |
| 1.299312            | 3.695465  | 0.517364  | 12   | -0.220926                       | -0.220438          | -0.174591     | -0.211830     |
| 0.686648            | 2.448096  | 0.218284  | 12   | 0.232195                        | 0.234998           | 0.160740      | 0.224204      |
| -0.686928           | 2.448149  | -0.217942 | 12   | 0.153070                        | 0.157454           | 0.094708      | 0.157122      |
| -1.299502           | 3.695567  | -0.516996 | 12   | -0.153797                       | -0.155065          | -0.124202     | -0.157753     |
| -0.647427           | 4.886859  | -0.277844 | 12   | -0.106405                       | -0.104082          | -0.089665     | -0.097204     |
| 1.405904            | 1.220471  | 0.286378  | 12   | -0.362743                       | -0.374965          | -0.213112     | -0.358810     |
| -1.406252           | 1.220572  | -0.286268 | 12   | -0.297967                       | -0.312125          | -0.165308     | -0.306579     |
| -0.729336           | 0.000005  | 0.000017  | 12   | 0.191790                        | 0.201148           | 0.106027      | 0.190387      |
| 0.728903            | -0.000005 | 0.000018  | 12   | 0.242394                        | 0.250561           | 0.149624      | 0.238935      |
| 1.405887            | -1.220489 | -0.286351 | 12   | -0.362738                       | -0.374959          | -0.213113     | -0.358806     |
| 0.686611            | -2.448104 | -0.218279 | 12   | 0.232196                        | 0.234999           | 0.160739      | 0.224207      |
| -0.686966           | -2.448141 | 0.217943  | 12   | 0.153073                        | 0.157457           | 0.094709      | 0.157122      |
| -1.406270           | -1.220554 | 0.286288  | 12   | -0.297979                       | -0.312137          | -0.165307     | -0.306588     |
| 1.139649            | 5.825094  | 0.504312  | 1    | 0.146823                        | 0.145392           | 0.135627      | 0.143358      |
| 2.299937            | 3.708473  | 0.923853  | 1    | 0.140596                        | 0.139362           | 0.132777      | 0.137096      |
| -2.300112           | 3.708648  | -0.923523 | 1    | 0.123011                        | 0.122286           | 0.119944      | 0.122467      |
| -1.139712           | 5.825185  | -0.503853 | 1    | 0.150419                        | 0.148889           | 0.138152      | 0.146133      |
| 1.299254            | -3.695479 | -0.517378 | 12   | -0.220918                       | -0.220429          | -0.174596     | -0.211826     |
| 0.647223            | -4.886813 | -0.278314 | 12   | -0.067873                       | -0.066738          | -0.062104     | -0.067219     |
| 2.299880            | -3.708497 | -0.923866 | 1    | 0.140595                        | 0.139361           | 0.132779      | 0.137096      |
| -1.299562           | -3.695554 | 0.516975  | 12   | -0.153809                       | -0.155077          | -0.124196     | -0.157760     |
| -0.647506           | -4.886853 | 0.277805  | 12   | -0.106395                       | -0.104072          | -0.089671     | -0.097198     |
| 1.139556            | -5.825105 | -0.504363 | 1    | 0.146824                        | 0.145394           | 0.135627      | 0.143358      |
| -2.300173           | -3.708625 | 0.923500  | 1    | 0.123012                        | 0.122288           | 0.119942      | 0.122468      |
| -1.139807           | -5.825175 | 0.503797  | 1    | 0.150418                        | 0.148888           | 0.138153      | 0.146133      |
| -2.798954           | 1.228850  | -0.813147 | 12   | 0.279529                        | 0.295478           | 0.175736      | 0.313838      |
| -3.042855           | 0.629923  | -2.059282 | 12   | -0.214176                       | -0.220623          | -0.155433     | -0.230805     |
| -3.850976           | 1.891814  | -0.164330 | 12   | -0.067880                       | -0.072904          | -0.086026     | -0.092316     |
| -4.305683           | 0.699034  | -2.644391 | 12   | -0.150968                       | -0.145732          | -0.133186     | -0.135391     |
| -2.234496           | 0.130226  | -2.581071 | 1    | 0.143091                        | 0.142830           | 0.122061      | 0.142293      |
| -5.117813           | 1.939958  | -0.740340 | 12   | -0.153852                       | -0.150247          | -0.127263     | -0.138543     |
| -3.682663           | 2.349347  | 0.803377  | 1    | 0.100325                        | 0.099797           | 0.103555      | 0.101343      |
| -5.347833           | 1.349884  | -1.984820 | 12   | -0.114177                       | -0.113298          | -0.098290     | -0.116045     |
| -4.472637           | 0.247168  | -3.615252 | 1    | 0.153966                        | 0.151601           | 0.138435      | 0.148071      |
| -5.924827           | 2.440397  | -0.218099 | 1    | 0.138284                        | 0.136201           | 0.129159      | 0.133646      |

|           |           |           |    |           |           |           |           |
|-----------|-----------|-----------|----|-----------|-----------|-----------|-----------|
| -6.331464 | 1.399716  | -2.436741 | 1  | 0.147393  | 0.145246  | 0.134165  | 0.143295  |
| -2.798977 | -1.228820 | 0.813153  | 12 | 0.279572  | 0.295520  | 0.175722  | 0.313873  |
| -3.851009 | -1.891728 | 0.164295  | 12 | -0.067898 | -0.072923 | -0.086016 | -0.092328 |
| -3.042875 | -0.629949 | 2.059316  | 12 | -0.214190 | -0.220638 | -0.155429 | -0.230819 |
| -5.117853 | -1.939868 | 0.740292  | 12 | -0.153842 | -0.150235 | -0.127269 | -0.138534 |
| -3.682699 | -2.349218 | -0.803433 | 1  | 0.100327  | 0.099799  | 0.103554  | 0.101343  |
| -4.305709 | -0.699058 | 2.644411  | 12 | -0.150968 | -0.145732 | -0.133185 | -0.135391 |
| -2.234507 | -0.130299 | 2.581137  | 1  | 0.143092  | 0.142831  | 0.122062  | 0.142294  |
| -5.347870 | -1.349849 | 1.984798  | 12 | -0.114187 | -0.113309 | -0.098284 | -0.116055 |
| -5.924875 | -2.440261 | 0.218019  | 1  | 0.138281  | 0.136198  | 0.129161  | 0.133643  |
| -4.472659 | -0.247237 | 3.615294  | 1  | 0.153968  | 0.151603  | 0.138434  | 0.148073  |
| -6.331505 | -1.399679 | 2.436708  | 1  | 0.147395  | 0.145248  | 0.134164  | 0.143298  |
| 2.798839  | 1.228505  | 0.812638  | 12 | 0.342739  | 0.354761  | 0.207807  | 0.353242  |
| 3.850665  | 1.891382  | 0.163412  | 12 | -0.095155 | -0.097141 | -0.095374 | -0.108749 |
| 3.043288  | 0.629150  | 2.058460  | 12 | -0.247630 | -0.250896 | -0.173162 | -0.248633 |
| 5.117816  | 1.939119  | 0.738764  | 12 | -0.163751 | -0.160373 | -0.137160 | -0.148370 |
| 3.681944  | 2.349154  | -0.804112 | 1  | 0.108787  | 0.107380  | 0.107357  | 0.107244  |
| 4.306443  | 0.697843  | 2.642912  | 12 | -0.144653 | -0.140419 | -0.133437 | -0.132734 |
| 2.235115  | 0.129433  | 2.580519  | 1  | 0.149350  | 0.148286  | 0.126039  | 0.145139  |
| 5.348373  | 1.348669  | 1.982967  | 12 | -0.103810 | -0.103773 | -0.087619 | -0.107652 |
| 5.924662  | 2.439508  | 0.216216  | 1  | 0.141887  | 0.139739  | 0.131584  | 0.136961  |
| 4.473828  | 0.245657  | 3.613550  | 1  | 0.152903  | 0.150683  | 0.138767  | 0.147254  |
| 6.332256  | 1.398169  | 2.434373  | 1  | 0.144295  | 0.142574  | 0.131499  | 0.141261  |
| 3.681911  | -2.349255 | 0.804091  | 1  | 0.108785  | 0.107379  | 0.107358  | 0.107245  |
| 3.850636  | -1.891453 | -0.163417 | 12 | -0.095140 | -0.097127 | -0.095381 | -0.108739 |
| 5.117784  | -1.939193 | -0.738776 | 12 | -0.163758 | -0.160380 | -0.137156 | -0.148375 |
| 2.798820  | -1.228535 | -0.812618 | 12 | 0.342707  | 0.354728  | 0.207816  | 0.353215  |
| 5.348348  | -1.348704 | -1.982959 | 12 | -0.103805 | -0.103767 | -0.087622 | -0.107647 |
| 5.924623  | -2.439616 | -0.216248 | 1  | 0.141889  | 0.139741  | 0.131583  | 0.136962  |
| 3.043276  | -0.629139 | -2.058418 | 12 | -0.247619 | -0.250884 | -0.173166 | -0.248623 |
| 4.306428  | -0.697834 | -2.642877 | 12 | -0.144650 | -0.140417 | -0.133438 | -0.132731 |
| 6.332229  | -1.398206 | -2.434371 | 1  | 0.144293  | 0.142572  | 0.131500  | 0.141260  |
| 2.235111  | -0.129387 | -2.580457 | 1  | 0.149348  | 0.148284  | 0.126039  | 0.145137  |
| 4.473818  | -0.245616 | -3.613499 | 1  | 0.152901  | 0.150680  | 0.138768  | 0.147251  |
